# Supplementary material for: Isolation and Characterisation of Quercitrin as a Potent Anti-Sickle Cell Anaemia Agent from Alchornea cordifolia
Source: J Clin Med. 2022 Apr 13;11(8):2177. doi: 10.3390/jcm11082177 (PMC9024604; doi:10.3390/jcm11082177)
Supplement: Supplementary file 1 [file jcm-11-02177-s001.zip › Table S1.csv]

	m/z	55.017073	55.018093	55.053483	55.05446	56.049727	56.965044	57.033721	57.044968	57.070127	58.040215	58.065374	59.049388	59.068726	59.073203	60.028841	60.031499	60.044603	60.05584	60.080987	60.531893	61.028617	61.030289	61.039835	61.052864	61.059183	61.084325	62.060238	63.928801	64.936629	65.037583	65.038746	65.0599	65.925683	66.01907	66.034018	66.046579	66.926789	66.933498	67.04182	67.052881	67.054386	67.924475	68.020256	68.025834	68.045179	68.049643	68.057775	68.996069
Sample	Label
AcV-611-3	AA	4.86E+03	4.51E+03	8.50E+02	5.56E+04	6.76E+04	1.57E+04	6.13E+04	4.42E+04	4.40E+04	3.69E+04	7.51E+05	7.05E+04	7.44E+03	6.62E+04	3.56E+02	3.80E+03	1.22E+05	2.12E+06	2.54E+06	1.74E+02	4.16E+02	3.68E+02	2.94E+04	4.22E+03	5.02E+02	2.76E+04	7.93E+04	3.55E+04	1.07E+04	5.53E+02	1.05E+05	2.17E+04	1.93E+04	4.33E+03	3.38E+03	1.26E+03	6.46E+02	6.31E+03	1.85E+05	8.50E+03	3.07E+05	1.73E+04	2.74E+03	1.82E+03	2.73E+02	8.27E+05	5.01E+03	1.74E+04
AcV-341-2	AA	8.62E+03	1.88E+02	6.70E+01	6.85E+04	3.69E+04	3.22E+04	2.00E+04	6.44E+04	4.51E+04	4.62E+03	3.13E+05	3.69E+04	1.62E+02	3.48E+03	2.95E+02	8.44E+02	6.83E+04	1.96E+06	1.43E+06	1.01E+02	2.27E+03	4.31E+02	1.25E+04	1.20E+02	2.32E+03	2.19E+04	4.30E+04	1.42E+05	1.26E+04	1.16E+04	1.17E+05	1.36E+04	9.17E+04	7.83E+02	1.89E+03	1.00E+03	1.34E+03	6.18E+03	7.59E+05	7.61E+03	2.99E+05	5.26E+04	1.02E+03	6.81E+03	1.13E+04	3.65E+05	6.76E+03	7.21E+03
AcV-231-2	AA	5.28E+02	1.41E+04	1.43E+02	3.28E+04	3.37E+04	1.82E+04	9.18E+04	2.41E+04	3.62E+04	9.96E+03	3.82E+05	6.10E+04	2.51E+03	2.54E+04	1.13E+02	5.29E+03	8.11E+04	1.22E+06	1.71E+06	8.87E+02	2.65E+04	2.84E+02	6.18E+03	3.46E+03	2.47E+03	3.14E+04	3.63E+04	1.35E+05	4.04E+04	2.24E+03	9.81E+04	2.51E+03	6.45E+04	3.08E+03	1.93E+04	7.87E+03	3.40E+03	1.90E+04	1.86E+05	4.46E+03	2.03E+05	4.89E+04	4.63E+03	3.36E+03	2.38E+02	4.20E+05	2.70E+03	1.34E+03
AcV-331-2	AA	2.82E+03	3.62E+03	3.69E+03	6.15E+04	5.10E+04	1.23E+04	4.71E+04	3.74E+04	2.15E+04	8.25E+03	5.60E+05	6.50E+04	4.04E+03	2.59E+04	6.40E+01	3.35E+03	9.15E+04	2.01E+06	2.79E+06	2.11E+02	8.69E+03	1.20E+01	1.18E+03	1.76E+03	5.89E+02	3.96E+04	5.52E+04	8.66E+04	2.62E+04	1.32E+03	1.14E+05	2.80E+03	4.81E+04	4.91E+03	1.76E+04	2.11E+03	1.20E+03	8.28E+03	2.89E+05	1.61E+03	2.71E+05	3.07E+04	1.39E+03	4.40E+03	6.39E+03	7.06E+05	4.02E+03	3.62E+03
AcV-511-5	AA	6.10E+03	2.26E+03	3.50E+02	4.05E+04	6.16E+04	2.08E+03	2.73E+04	4.35E+04	3.12E+04	4.69E+04	5.54E+05	4.26E+04	1.27E+02	2.83E+04	9.01E+02	6.11E+02	1.81E+05	2.35E+06	2.60E+06	8.27E+02	2.35E+02	2.35E+02	2.60E+04	3.46E+03	2.11E+03	4.20E+04	8.19E+04	1.26E+04	2.04E+03	7.39E+02	6.14E+04	1.38E+04	4.03E+03	1.57E+02	2.96E+03	4.66E+02	1.14E+02	1.14E+02	1.88E+05	1.26E+03	1.96E+05	3.49E+03	7.80E+02	1.66E+02	1.66E+02	6.78E+05	1.39E+02	1.23E+04
AcV-421-3	AA	4.97E+02	1.67E+03	9.12E+02	7.77E+04	4.52E+04	8.25E+03	5.95E+04	6.60E+04	5.18E+04	2.19E+04	6.15E+05	5.51E+04	2.06E+03	3.71E+04	1.34E+02	2.10E+03	1.04E+05	3.24E+06	3.21E+06	9.09E+02	7.58E+03	1.68E+02	9.57E+03	1.03E+04	7.03E+03	4.72E+04	8.25E+04	7.08E+04	6.53E+03	4.86E+02	1.50E+05	1.43E+04	3.53E+04	2.59E+02	4.95E+03	2.42E+02	3.85E+02	3.85E+02	4.27E+05	2.78E+03	3.38E+05	2.55E+04	2.71E+03	3.84E+03	2.47E+03	4.77E+05	3.88E+03	6.66E+03
AcV-131-1	AA	1.90E+01	3.50E+03	3.30E+01	4.55E+04	4.52E+04	3.61E+04	4.16E+04	4.04E+04	1.74E+04	1.94E+04	5.52E+05	5.66E+04	7.77E+03	3.60E+04	1.20E+01	8.02E+03	7.76E+04	1.93E+06	2.09E+06	4.50E+02	1.76E+04	1.17E+03	1.36E+04	5.31E+03	3.78E+03	3.97E+04	3.16E+04	1.72E+05	3.59E+04	1.20E+02	1.47E+05	2.29E+03	9.93E+04	9.50E+02	4.31E+03	2.96E+03	7.54E+03	2.44E+04	4.40E+05	2.53E+03	2.89E+05	7.09E+04	6.70E+03	7.98E+03	4.68E+03	5.41E+05	7.20E+03	5.93E+03
AcV-321-3	AA	3.45E+02	3.45E+02	3.45E+02	7.15E+04	3.81E+04	7.99E+03	7.39E+04	3.90E+04	3.00E+04	3.02E+04	5.34E+05	4.45E+04	1.15E+02	2.47E+04	3.06E+02	6.22E+03	8.72E+04	1.80E+06	2.90E+06	9.89E+02	5.34E+03	1.05E+02	8.72E+03	3.17E+03	1.65E+03	2.77E+04	7.08E+04	5.08E+04	5.37E+03	2.50E+01	7.77E+04	2.31E+04	2.76E+04	2.40E+01	6.37E+03	4.22E+03	2.57E+03	3.98E+03	3.95E+05	8.75E+03	2.74E+05	1.95E+04	3.31E+03	2.54E+03	1.27E+03	7.23E+05	4.75E+02	8.00E+03
AcV-311-4	AA	4.24E+03	3.09E+02	3.09E+02	7.76E+04	5.86E+04	1.09E+04	9.60E+04	4.61E+04	3.90E+04	1.33E+04	4.30E+05	4.89E+04	4.14E+03	1.48E+04	4.04E+02	1.59E+03	8.23E+04	1.66E+06	1.94E+06	5.72E+02	1.45E+04	7.16E+02	1.29E+04	1.23E+02	1.83E+03	2.49E+04	5.38E+04	9.69E+04	2.05E+04	2.92E+03	8.64E+04	2.85E+04	5.47E+04	3.88E+03	5.75E+03	8.30E+01	3.22E+03	1.70E+04	4.91E+05	5.53E+03	3.55E+05	2.47E+04	6.32E+03	9.68E+03	1.47E+04	5.19E+05	1.17E+03	2.03E+04
AcV-621-1	AA	3.10E+03	1.15E+04	9.43E+02	4.28E+04	3.78E+04	6.90E+03	8.50E+04	4.91E+04	3.69E+04	2.49E+04	6.19E+05	7.34E+04	3.03E+03	3.76E+04	1.04E+03	6.00E+03	1.28E+05	2.97E+06	2.55E+06	7.17E+02	2.16E+04	4.31E+02	1.72E+04	3.85E+03	1.04E+04	3.96E+04	3.95E+04	7.22E+04	1.14E+04	4.54E+03	1.19E+05	1.65E+04	3.50E+04	3.04E+03	1.51E+04	1.72E+02	1.64E+03	7.49E+03	3.41E+05	3.10E+02	2.69E+05	1.72E+04	4.52E+03	3.27E+03	2.76E+02	6.94E+05	6.71E+03	1.29E+03
AcV-241-1	AA	5.86E+02	1.57E+03	6.59E+02	5.06E+04	3.58E+04	3.93E+03	5.95E+04	2.93E+04	3.57E+04	3.47E+03	4.91E+05	3.37E+04	2.17E+03	3.03E+04	9.35E+02	2.10E+03	8.53E+04	2.35E+06	2.43E+06	6.37E+02	7.46E+03	1.00E+02	6.82E+03	2.10E+01	7.60E+03	4.08E+04	6.35E+04	7.44E+04	1.34E+04	3.21E+02	9.72E+04	2.13E+04	1.97E+04	2.61E+03	4.15E+03	7.22E+02	1.95E+03	7.10E+03	2.78E+05	4.05E+03	2.01E+05	1.95E+04	3.66E+03	4.75E+03	3.96E+02	4.15E+05	1.55E+03	3.20E+01
AcV-111-5	AA	4.37E+03	1.72E+04	1.78E+03	7.14E+04	5.04E+04	6.40E+03	8.24E+04	2.37E+04	5.13E+04	2.37E+04	4.83E+05	5.95E+04	4.05E+03	3.36E+04	1.56E+02	5.14E+03	9.50E+04	2.91E+06	1.89E+06	6.04E+02	1.13E+04	8.95E+02	6.47E+03	6.89E+03	8.73E+03	2.27E+04	3.76E+04	1.32E+05	3.24E+03	2.41E+03	9.64E+04	1.50E+04	8.18E+04	7.50E+02	1.16E+04	1.49E+04	3.33E+03	2.76E+03	2.61E+05	5.30E+03	2.57E+05	4.62E+04	4.37E+03	3.74E+03	2.85E+03	3.08E+05	1.90E+03	1.28E+04
AcV-531-3	AA	1.13E+04	8.37E+03	3.70E+02	5.39E+04	7.61E+04	4.09E+02	4.11E+04	8.12E+04	3.02E+04	4.14E+04	4.46E+05	5.23E+04	5.51E+03	1.49E+04	1.70E+02	1.70E+02	2.44E+05	2.22E+06	2.31E+06	1.41E+02	2.31E+03	3.48E+02	1.10E+04	5.67E+03	1.02E+02	4.03E+04	4.62E+04	1.41E+04	7.34E+02	5.81E+03	5.33E+04	2.33E+04	1.05E+04	4.81E+02	3.13E+03	9.11E+02	6.60E+02	6.60E+02	2.35E+05	3.46E+03	1.96E+05	1.11E+03	3.55E+02	2.16E+03	7.01E+02	6.45E+05	3.17E+03	1.64E+04
AcV-221-2	AA	2.14E+03	1.84E+03	4.52E+02	5.03E+04	5.91E+04	1.06E+04	4.97E+04	3.28E+04	2.90E+04	8.43E+03	5.33E+05	1.94E+04	1.15E+04	2.25E+04	3.84E+02	2.47E+03	1.05E+05	1.64E+06	2.67E+06	5.46E+02	5.51E+03	1.19E+02	1.31E+04	2.73E+03	9.61E+03	4.14E+04	6.05E+04	9.20E+04	1.21E+04	1.28E+02	6.34E+04	2.51E+04	6.17E+04	3.74E+03	3.20E+02	5.80E+03	2.23E+03	1.05E+04	2.25E+05	1.88E+03	1.96E+05	3.52E+04	3.88E+03	1.09E+03	1.68E+02	6.01E+05	3.10E+03	4.86E+03
AcV-351-5	AA	5.77E+02	1.78E+03	1.16E+02	5.76E+04	4.72E+04	3.73E+03	7.72E+04	8.22E+04	8.36E+04	8.39E+03	5.92E+05	4.99E+04	9.87E+02	3.96E+04	8.03E+02	5.85E+03	9.59E+04	2.46E+06	3.08E+06	4.20E+02	8.20E+01	2.21E+03	4.02E+03	5.36E+02	1.25E+04	4.08E+04	1.66E+05	6.51E+04	1.26E+02	1.29E+03	1.09E+05	2.87E+04	9.54E+03	4.13E+02	4.13E+02	4.13E+02	2.37E+03	5.72E+02	5.81E+05	5.41E+02	2.66E+05	9.57E+03	5.42E+03	1.35E+04	9.77E+03	2.84E+05	4.65E+03	1.24E+04
AcV-631-5	AA	6.76E+03	5.21E+03	1.64E+02	5.62E+04	3.15E+04	3.55E+03	5.60E+04	4.19E+04	2.04E+04	3.48E+03	5.38E+05	3.55E+04	8.80E+01	6.24E+04	1.51E+02	1.83E+03	1.14E+05	2.90E+06	1.47E+06	1.79E+02	8.81E+03	4.65E+02	4.35E+03	5.97E+03	2.97E+03	1.70E+04	3.17E+04	7.66E+04	5.43E+02	3.03E+03	4.35E+04	1.21E+04	3.58E+04	1.04E+02	2.01E+03	7.00E+01	6.54E+03	2.70E+03	1.05E+05	2.23E+03	1.50E+05	9.93E+03	3.25E+03	3.70E+02	3.51E+03	1.72E+05	2.53E+03	1.21E+04
AcV-411-3	AA	5.58E+03	3.22E+02	3.21E+03	3.93E+04	3.97E+04	7.13E+03	6.31E+04	4.70E+04	4.16E+04	4.72E+04	7.70E+05	2.63E+04	7.59E+02	1.38E+05	2.24E+02	2.24E+02	9.95E+04	3.47E+06	1.73E+06	9.63E+02	3.36E+03	1.33E+02	5.96E+03	9.53E+03	8.34E+03	2.72E+04	7.42E+04	3.87E+04	1.98E+02	5.23E+03	6.84E+04	1.72E+04	2.49E+04	4.28E+02	2.53E+02	4.24E+03	1.64E+02	1.64E+02	3.90E+05	4.97E+03	3.13E+05	1.43E+04	1.88E+02	1.88E+02	1.88E+02	3.35E+05	2.75E+02	1.21E+04
AcV-151-1	AA	1.01E+02	1.01E+02	2.84E+03	5.78E+04	3.19E+04	1.90E+04	4.91E+04	2.29E+04	3.31E+04	8.01E+03	5.89E+05	6.32E+04	5.73E+03	4.27E+04	3.84E+02	1.27E+04	9.40E+04	1.87E+06	2.99E+06	6.28E+02	3.67E+03	5.71E+02	1.84E+04	1.22E+03	2.34E+02	6.13E+04	7.06E+04	9.62E+04	3.44E+04	2.02E+03	7.31E+04	1.35E+04	5.30E+04	5.93E+03	8.42E+03	3.10E+02	4.77E+03	1.09E+04	2.33E+05	2.73E+03	1.92E+05	4.23E+04	1.15E+04	2.38E+03	2.56E+02	4.18E+05	1.00E+04	5.17E+03
AcV-121-5	AA	1.21E+02	1.21E+02	1.21E+02	6.33E+04	6.02E+04	1.65E+02	4.46E+04	6.58E+04	2.36E+04	4.04E+04	4.72E+05	2.65E+04	5.09E+03	1.99E+04	1.29E+03	1.67E+03	1.21E+05	3.40E+06	2.39E+06	3.62E+02	2.48E+02	2.48E+02	2.48E+02	1.32E+02	8.29E+03	2.74E+04	4.63E+04	4.55E+04	2.76E+03	3.76E+03	7.43E+04	7.73E+03	4.81E+04	1.83E+02	4.80E+02	9.93E+02	2.30E+03	5.44E+02	4.02E+05	7.39E+03	2.29E+05	2.17E+04	2.16E+03	2.79E+03	7.94E+02	4.98E+05	2.88E+03	8.56E+03
AcV-431-1	AA	3.51E+03	5.61E+03	2.56E+03	6.20E+04	3.03E+04	7.53E+02	6.39E+04	2.66E+04	3.13E+04	1.42E+04	5.06E+05	4.22E+04	9.41E+03	3.92E+04	3.16E+02	3.14E+03	1.02E+05	2.28E+06	2.36E+06	1.30E+03	6.60E+03	3.84E+02	6.44E+03	4.24E+03	1.04E+03	2.38E+04	6.29E+04	9.71E+04	3.04E+03	1.45E+02	7.58E+04	3.40E+04	3.89E+04	1.09E+02	2.64E+02	6.30E+03	2.64E+03	4.11E+03	3.20E+05	6.88E+02	2.74E+05	1.27E+04	6.75E+03	3.65E+03	6.95E+02	5.58E+05	3.21E+03	4.41E+03
AcV-451-3	AA	6.51E+03	7.78E+02	7.78E+02	6.30E+04	4.02E+04	6.66E+02	6.54E+04	5.61E+04	5.37E+04	1.83E+04	7.36E+05	4.84E+04	1.40E+04	3.67E+04	2.13E+03	8.64E+03	1.20E+05	3.15E+06	3.72E+06	1.82E+02	4.32E+03	1.56E+02	1.40E+04	3.75E+03	7.45E+03	5.75E+04	1.42E+05	2.19E+04	3.70E+03	1.08E+02	7.89E+04	3.33E+04	1.23E+04	1.09E+02	4.91E+03	1.53E+02	2.45E+03	1.31E+02	3.75E+05	5.41E+03	3.01E+05	8.09E+03	6.97E+03	1.06E+03	3.08E+03	6.50E+05	2.00E+02	1.42E+02
AcV-521-2	AA	4.95E+02	1.96E+03	8.99E+02	9.39E+04	7.79E+04	1.40E+04	9.70E+04	3.94E+04	6.22E+04	8.80E+03	8.97E+05	6.31E+04	1.08E+04	1.41E+05	3.06E+02	1.49E+04	1.82E+05	2.65E+06	1.60E+06	7.71E+02	2.91E+03	5.88E+02	4.69E+04	1.76E+04	1.41E+04	2.59E+04	8.26E+04	1.27E+05	6.89E+03	2.20E+03	1.25E+05	1.56E+04	5.24E+04	5.41E+03	1.98E+03	1.42E+03	2.24E+03	2.79E+03	1.94E+05	8.70E+02	3.02E+05	2.46E+04	6.14E+03	4.15E+03	3.99E+02	4.91E+05	3.33E+02	4.37E+03
AcV-141-3	AA	7.32E+02	4.02E+03	8.47E+02	4.15E+04	4.95E+04	3.50E+03	4.48E+04	3.29E+04	3.31E+04	1.03E+04	4.90E+05	5.25E+04	2.85E+03	3.85E+04	1.06E+02	5.18E+03	1.06E+05	2.43E+06	2.67E+06	1.15E+02	4.28E+03	4.35E+02	1.31E+04	1.22E+04	9.65E+03	5.44E+04	4.20E+04	4.49E+04	3.29E+02	1.16E+03	6.40E+04	2.05E+04	2.88E+04	1.96E+02	1.96E+02	1.96E+02	6.22E+02	6.22E+02	1.96E+05	6.29E+03	1.81E+05	2.63E+04	8.25E+03	6.70E+01	2.65E+03	5.05E+05	1.89E+03	9.72E+03
AcV-211-1	AA	6.92E+03	4.21E+03	8.09E+02	2.42E+04	4.16E+04	6.74E+03	6.90E+04	5.75E+04	3.39E+04	1.97E+04	6.12E+05	5.56E+04	9.42E+02	6.62E+04	1.84E+02	1.61E+03	6.88E+04	3.76E+06	1.95E+06	1.05E+02	8.18E+03	4.09E+02	9.80E+03	1.48E+04	1.18E+04	1.92E+04	4.09E+04	6.29E+04	1.39E+04	1.45E+02	6.61E+04	5.22E+03	3.30E+04	2.20E+03	4.92E+03	1.73E+02	1.70E+02	3.97E+03	2.61E+05	2.74E+03	2.54E+05	1.89E+04	5.02E+03	1.68E+03	9.38E+02	2.72E+05	6.45E+03	8.55E+03
AcV-441-1	AA	9.48E+03	3.75E+03	4.44E+03	5.22E+04	5.03E+04	2.99E+03	5.60E+04	5.23E+04	5.68E+04	4.64E+04	4.06E+05	4.31E+04	3.32E+03	2.91E+04	1.18E+02	1.18E+02	1.11E+05	2.09E+06	2.17E+06	2.49E+02	8.83E+02	8.83E+02	1.95E+04	9.93E+02	1.76E+03	2.99E+04	4.91E+04	4.53E+04	3.95E+03	3.29E+03	6.98E+04	2.02E+04	2.00E+04	4.08E+02	7.80E+03	7.74E+02	2.71E+03	9.50E+01	4.10E+05	2.16E+03	2.34E+05	1.81E+04	1.26E+03	1.85E+02	1.85E+02	6.18E+05	4.44E+03	8.61E+03
AcV-541-5	AA	3.30E+03	2.37E+03	2.32E+02	9.04E+04	8.36E+04	1.09E+02	5.36E+04	7.99E+04	4.34E+04	3.10E+04	5.06E+05	6.03E+04	5.62E+03	2.42E+04	3.30E+02	3.30E+02	3.32E+05	2.60E+06	2.67E+06	1.07E+02	1.23E+02	1.23E+02	1.95E+04	5.85E+03	3.24E+03	4.70E+04	9.19E+04	1.70E+04	1.24E+02	1.24E+02	9.11E+04	5.45E+03	1.12E+04	5.66E+02	3.71E+03	2.18E+02	3.10E+02	3.10E+02	2.05E+05	1.25E+02	2.25E+05	4.18E+03	8.53E+02	2.57E+03	2.62E+03	4.61E+05	7.62E+02	5.29E+03
AcV-251-1	SS	5.31E+03	1.97E+03	1.32E+02	4.77E+04	7.93E+04	5.52E+03	9.13E+04	2.27E+04	6.39E+04	1.25E+04	6.02E+05	6.12E+04	1.02E+04	3.15E+04	3.23E+02	1.46E+04	1.41E+05	2.00E+06	2.92E+06	1.39E+03	1.32E+03	1.91E+03	3.20E+04	2.93E+03	7.14E+03	5.07E+04	1.27E+05	8.36E+04	3.41E+03	1.73E+02	6.25E+04	2.17E+04	4.82E+04	2.07E+03	6.93E+03	1.88E+03	3.01E+03	5.69E+02	8.73E+04	2.14E+03	2.68E+05	2.04E+04	9.23E+03	2.45E+03	6.14E+02	6.11E+05	2.63E+03	8.70E+01
AcV-511-1	SS	9.23E+03	7.15E+02	3.15E+02	6.75E+04	4.44E+04	3.69E+03	5.65E+04	6.02E+04	2.59E+04	2.49E+04	6.73E+05	4.39E+04	4.96E+03	4.00E+04	8.02E+02	1.32E+03	1.87E+05	2.44E+06	2.89E+06	2.33E+02	3.57E+03	6.09E+02	4.48E+04	2.63E+02	2.63E+02	6.02E+04	8.66E+04	6.64E+03	9.45E+03	1.21E+02	7.94E+04	2.45E+04	8.52E+03	1.53E+03	1.07E+03	1.82E+02	4.41E+02	4.08E+03	2.17E+05	4.96E+02	1.89E+05	3.81E+03	1.02E+03	2.46E+02	6.32E+03	4.53E+05	2.98E+03	1.36E+02
AcV-241-5	SS	1.16E+04	4.92E+03	3.02E+03	6.54E+04	5.55E+04	2.76E+03	5.09E+04	4.26E+04	3.14E+04	1.20E+04	5.47E+05	4.51E+04	1.23E+02	3.21E+04	1.23E+02	1.07E+03	1.20E+05	2.80E+06	3.15E+06	1.13E+02	5.80E+03	1.35E+02	9.02E+03	8.60E+03	3.67E+03	5.53E+04	3.50E+04	5.11E+04	4.34E+03	3.91E+02	6.70E+04	1.65E+04	2.17E+04	2.62E+02	3.92E+03	5.81E+02	2.66E+03	5.49E+02	4.34E+05	4.20E+03	2.35E+05	2.92E+04	2.44E+03	3.23E+03	2.98E+02	5.84E+05	4.85E+03	6.93E+03
AcV-351-4	SS	1.28E+02	1.28E+02	3.68E+03	8.19E+04	5.00E+04	5.09E+03	7.56E+04	6.51E+04	4.05E+04	1.81E+04	7.12E+05	5.27E+04	3.13E+02	3.36E+04	3.92E+02	8.31E+03	1.13E+05	2.38E+06	3.47E+06	1.36E+02	1.39E+04	4.05E+02	1.25E+04	3.58E+03	5.50E+03	7.02E+04	1.17E+05	3.87E+04	1.89E+02	1.89E+02	1.14E+05	4.35E+04	8.53E+03	2.01E+02	1.41E+03	3.36E+02	8.98E+02	8.98E+02	5.52E+05	5.97E+03	2.74E+05	5.52E+03	6.03E+03	5.01E+02	1.74E+04	6.36E+05	1.84E+02	1.27E+02
AcV-431-5	SS	5.12E+02	6.14E+03	3.27E+03	9.13E+04	9.59E+04	3.37E+03	8.57E+04	5.01E+04	4.99E+04	2.35E+04	5.17E+05	4.53E+04	9.12E+02	4.38E+04	6.09E+02	1.47E+03	1.35E+05	2.37E+06	2.34E+06	1.03E+02	8.64E+03	1.28E+02	3.81E+03	1.94E+02	1.02E+04	3.69E+04	7.98E+04	3.65E+04	5.96E+02	6.60E+02	1.22E+05	2.33E+04	1.79E+04	6.76E+02	7.26E+03	2.68E+03	1.18E+02	1.18E+02	5.96E+05	4.75E+03	2.83E+05	1.29E+04	7.11E+02	4.73E+03	4.42E+03	6.73E+05	7.88E+03	3.77E+03
AcV-141-5	SS	5.11E+03	7.31E+03	6.89E+02	7.12E+04	4.39E+04	5.33E+03	4.60E+04	4.19E+04	3.76E+04	1.41E+02	4.69E+05	2.48E+04	7.62E+02	4.37E+04	3.67E+02	3.71E+03	9.97E+04	2.06E+06	2.27E+06	9.39E+02	9.48E+03	6.78E+02	3.80E+03	4.97E+02	3.19E+03	3.60E+04	2.92E+04	8.57E+04	2.08E+03	1.06E+02	9.42E+04	3.36E+03	3.10E+04	5.82E+02	4.65E+02	7.00E+00	2.15E+03	3.30E+02	3.07E+05	3.91E+03	1.95E+05	1.16E+04	3.86E+03	4.16E+03	6.66E+03	5.35E+05	1.61E+02	7.99E+03
AcV-251-3	SS	9.38E+02	9.38E+02	3.07E+02	5.93E+04	6.98E+04	5.46E+03	6.39E+04	3.48E+04	7.20E+04	6.67E+03	7.13E+05	5.80E+04	8.39E+03	3.64E+04	4.20E+02	4.20E+02	1.25E+05	1.79E+06	2.98E+06	3.52E+02	3.23E+03	3.16E+02	2.09E+04	8.15E+03	4.26E+03	4.17E+04	9.31E+04	1.14E+05	4.90E+03	1.48E+02	1.13E+05	1.49E+04	4.29E+04	1.83E+03	1.75E+02	2.44E+03	2.19E+03	3.26E+02	1.25E+05	3.48E+03	3.00E+05	2.80E+04	2.28E+03	2.60E+01	2.60E+01	7.76E+05	3.60E+03	6.19E+03
AcV-321-2	SS	7.94E+02	7.94E+02	7.94E+02	4.82E+04	6.68E+04	3.28E+03	6.53E+04	4.88E+04	3.98E+04	1.07E+04	5.33E+05	2.80E+04	1.66E+02	1.92E+04	4.41E+02	1.56E+03	1.02E+05	1.84E+06	2.46E+06	1.24E+02	6.03E+03	5.84E+02	8.35E+03	1.09E+03	3.81E+03	1.77E+04	5.27E+04	3.51E+04	1.16E+02	9.30E+02	1.22E+05	4.65E+04	1.71E+04	3.52E+02	9.50E+03	2.47E+02	2.12E+02	2.12E+02	5.29E+05	8.13E+03	2.94E+05	1.09E+04	3.97E+02	3.97E+02	1.53E+03	7.84E+05	3.73E+02	8.64E+03
AcV-131-4	SS	1.06E+02	9.18E+03	1.47E+02	5.60E+04	5.09E+04	1.28E+04	7.01E+04	3.94E+04	4.35E+04	6.29E+03	6.03E+05	4.48E+04	1.66E+03	5.06E+04	3.77E+02	3.79E+03	9.23E+04	2.00E+06	2.73E+06	2.91E+02	1.11E+04	3.65E+02	1.34E+03	7.92E+03	2.43E+03	5.94E+04	4.18E+04	1.38E+05	2.51E+04	1.38E+02	8.41E+04	2.76E+03	7.92E+04	3.24E+03	2.26E+03	1.40E+03	4.08E+03	9.58E+03	2.72E+05	1.64E+03	1.99E+05	4.55E+04	2.52E+03	4.46E+03	4.62E+02	3.80E+05	2.64E+03	2.32E+03
AcV-331-4	SS	3.60E+01	2.05E+03	2.42E+03	9.24E+04	2.07E+04	8.03E+02	5.59E+04	5.88E+04	3.07E+04	1.60E+02	4.07E+05	4.47E+04	6.29E+03	2.92E+04	8.20E+02	2.39E+03	1.07E+05	1.97E+06	2.17E+06	6.05E+02	3.28E+03	2.50E+01	3.28E+03	8.06E+02	5.70E+01	3.87E+04	5.86E+04	7.89E+04	1.29E+02	1.17E+02	8.97E+04	1.21E+04	4.75E+04	1.14E+02	8.08E+03	2.87E+02	3.20E+02	3.20E+02	4.95E+05	1.23E+02	2.59E+05	2.52E+04	8.50E+02	2.58E+03	4.23E+03	3.51E+05	2.92E+03	2.74E+03
AcV-441-5	SS	5.69E+02	5.69E+02	3.07E+02	5.02E+04	3.68E+04	2.98E+03	5.80E+04	4.78E+04	4.25E+04	1.99E+04	3.82E+05	3.04E+04	2.84E+02	1.01E+04	5.97E+02	5.97E+02	9.44E+04	1.68E+06	2.08E+06	2.05E+02	4.61E+02	4.61E+02	9.99E+03	4.32E+03	1.11E+02	3.52E+04	6.11E+04	2.61E+04	1.25E+02	3.99E+03	7.92E+04	1.55E+04	1.48E+04	1.60E+02	1.60E+02	1.60E+02	1.91E+02	1.91E+02	3.73E+05	6.41E+02	2.56E+05	1.48E+04	1.10E+02	1.10E+02	4.79E+03	6.60E+05	4.00E+03	1.52E+04
AcV-531-2	SS	5.00E+03	5.91E+02	3.49E+02	7.91E+04	9.86E+04	1.22E+02	4.62E+04	8.92E+04	4.21E+04	3.83E+04	4.87E+05	3.13E+04	9.00E+02	2.54E+04	9.42E+02	9.42E+02	2.32E+05	1.94E+06	1.93E+06	1.71E+02	1.29E+02	1.29E+02	1.51E+04	6.60E+02	3.14E+02	1.59E+04	5.15E+04	1.61E+04	2.63E+02	1.77E+02	9.09E+04	1.69E+04	1.53E+04	2.70E+02	2.70E+02	2.70E+02	1.63E+02	1.63E+02	3.28E+05	6.93E+03	2.19E+05	1.01E+04	3.96E+02	3.96E+02	3.96E+02	6.44E+05	1.57E+03	1.20E+03
AcV-211-2	SS	5.24E+03	1.51E+04	1.26E+02	5.74E+04	4.33E+04	6.00E+02	8.46E+04	6.35E+04	7.66E+04	1.78E+04	5.52E+05	3.32E+04	6.68E+03	2.60E+04	9.96E+02	9.96E+02	1.10E+05	3.43E+06	1.82E+06	1.46E+02	3.47E+03	1.44E+02	1.44E+02	9.06E+03	2.08E+02	3.07E+04	5.38E+04	6.43E+04	1.33E+02	4.53E+03	1.10E+05	1.48E+04	4.45E+04	4.15E+02	1.28E+04	4.05E+03	2.74E+02	2.74E+02	4.17E+05	8.58E+02	2.26E+05	1.43E+04	5.35E+02	7.90E+01	7.90E+01	3.24E+05	1.53E+02	7.14E+03
AcV-451-1	SS	4.24E+03	5.92E+02	5.92E+02	4.95E+04	6.16E+04	1.65E+03	8.50E+04	4.13E+04	2.65E+04	1.03E+04	6.49E+05	5.86E+04	2.24E+02	2.86E+04	5.26E+02	2.53E+03	1.03E+05	1.96E+06	3.04E+06	6.26E+02	1.11E+04	7.34E+02	3.24E+03	2.04E+02	2.04E+02	4.08E+04	9.27E+04	2.77E+04	1.50E+03	3.79E+02	8.16E+04	4.37E+04	4.17E+03	7.66E+02	5.43E+03	9.86E+02	1.33E+02	2.14E+02	3.49E+05	7.89E+03	2.52E+05	6.61E+03	1.69E+03	7.50E+03	8.06E+02	7.99E+05	4.29E+02	8.62E+02
AcV-621-5	SS	3.57E+03	7.67E+03	9.18E+02	5.02E+04	5.52E+04	3.30E+03	5.23E+04	4.99E+04	2.17E+04	3.99E+04	6.25E+05	6.69E+04	7.52E+03	3.31E+04	1.56E+02	1.56E+02	1.40E+05	2.34E+06	2.53E+06	2.59E+02	6.89E+03	8.36E+02	1.59E+04	1.17E+03	7.59E+03	4.49E+04	5.35E+04	3.72E+04	3.27E+03	8.17E+02	1.35E+05	1.37E+04	2.45E+04	1.07E+02	1.16E+04	1.68E+02	2.58E+03	1.09E+02	2.85E+05	1.16E+03	2.29E+05	1.75E+04	2.11E+02	2.11E+02	2.11E+02	5.88E+05	2.16E+03	5.38E+03
AcV-221-3	SS	1.50E+03	2.07E+03	1.18E+02	3.92E+04	6.96E+04	1.02E+04	4.22E+04	2.21E+04	3.15E+04	6.29E+03	5.43E+05	3.13E+04	3.96E+03	2.39E+04	4.73E+02	2.71E+03	1.15E+05	1.85E+06	2.40E+06	2.49E+03	3.04E+03	4.11E+02	6.20E+03	3.23E+03	2.29E+03	4.11E+04	6.84E+04	7.31E+04	7.21E+03	2.38E+03	1.23E+05	1.95E+04	3.66E+04	1.24E+03	8.48E+03	2.42E+03	1.59E+03	2.91E+03	2.84E+05	7.15E+02	1.72E+05	1.88E+04	3.91E+03	2.17E+02	5.07E+03	6.44E+05	3.49E+03	3.39E+03
AcV-151-2	SS	2.42E+03	8.87E+03	1.07E+03	6.25E+04	4.48E+04	8.87E+03	5.32E+04	3.26E+04	4.74E+04	5.31E+03	4.95E+05	4.26E+04	3.45E+03	3.15E+04	3.56E+02	3.47E+03	8.71E+04	1.89E+06	2.38E+06	7.32E+02	6.79E+03	9.48E+02	9.02E+03	2.50E+03	6.95E+03	3.78E+04	3.70E+04	1.15E+05	1.05E+03	9.00E+01	1.33E+05	9.39E+03	3.51E+04	3.83E+02	1.31E+04	2.33E+03	2.52E+03	2.84E+03	2.85E+05	2.29E+03	2.13E+05	2.97E+04	6.42E+03	3.69E+03	5.69E+03	4.90E+05	5.74E+02	1.34E+02
AcV-521-1	SS	5.81E+02	7.19E+03	4.34E+03	7.61E+04	4.60E+04	1.03E+04	8.44E+04	3.73E+04	7.27E+04	5.32E+03	7.45E+05	6.88E+04	3.50E+02	1.05E+05	8.16E+02	1.89E+03	1.95E+05	2.21E+06	1.42E+06	2.19E+02	8.35E+03	6.67E+02	1.66E+04	2.25E+02	5.43E+02	2.07E+04	6.99E+04	8.95E+04	1.05E+04	5.46E+02	1.79E+05	1.93E+04	4.40E+04	3.34E+02	8.36E+03	6.28E+03	4.19E+03	2.87E+03	2.38E+05	4.94E+03	3.06E+05	4.46E+04	2.08E+03	4.28E+03	1.29E+02	4.02E+05	2.39E+03	1.70E+03
AcV-611-5	SS	1.80E+03	1.54E+04	6.26E+02	9.15E+04	1.30E+05	3.95E+03	6.48E+04	4.74E+04	9.47E+04	2.63E+04	8.71E+05	6.98E+04	1.08E+04	1.53E+05	4.91E+02	6.17E+03	1.32E+05	3.08E+06	1.67E+06	2.82E+02	5.03E+03	5.82E+02	3.71E+04	1.01E+04	4.49E+03	2.95E+04	1.54E+05	3.18E+04	2.14E+02	2.14E+02	1.13E+05	1.43E+04	2.71E+04	1.15E+02	9.80E+03	1.11E+04	1.34E+02	1.34E+02	1.54E+05	8.90E+01	3.13E+05	1.88E+04	4.08E+03	6.61E+03	2.09E+02	3.94E+05	5.77E+03	5.56E+03
AcV-121-1	SS	8.15E+03	7.77E+03	9.33E+02	4.56E+04	6.63E+04	2.19E+03	4.66E+04	9.13E+04	2.52E+04	2.66E+04	3.91E+05	3.19E+04	1.33E+02	9.95E+03	2.78E+02	1.09E+03	1.25E+05	2.95E+06	1.74E+06	1.55E+02	2.24E+03	7.08E+02	4.88E+03	5.86E+03	5.79E+03	1.04E+02	2.84E+04	4.48E+04	6.78E+03	2.88E+03	8.99E+04	8.23E+03	3.04E+04	4.46E+02	6.79E+03	3.81E+03	6.87E+02	6.87E+02	6.27E+05	3.92E+03	2.66E+05	7.08E+03	1.95E+02	4.04E+03	2.87E+02	5.39E+05	4.48E+03	4.82E+03
AcV-421-2	SS	6.62E+02	1.58E+03	8.54E+02	7.47E+04	3.80E+04	3.41E+02	4.69E+04	7.10E+04	6.46E+04	2.49E+04	5.81E+05	3.51E+04	1.61E+02	3.38E+04	1.35E+02	5.74E+02	1.05E+05	2.74E+06	2.69E+06	9.76E+02	6.56E+02	6.56E+02	2.69E+03	1.32E+03	1.24E+04	3.04E+04	5.84E+04	6.35E+04	9.37E+02	9.37E+02	8.41E+04	1.35E+04	2.54E+04	6.97E+02	8.20E+02	1.53E+02	1.12E+02	1.12E+02	4.22E+05	2.63E+03	2.36E+05	1.44E+04	4.88E+02	5.79E+03	7.08E+03	4.36E+05	4.08E+03	2.47E+02
AcV-631-4	SS	3.76E+03	2.13E+03	7.61E+02	3.85E+04	2.18E+04	2.72E+03	3.97E+04	5.43E+04	2.33E+04	1.08E+02	3.34E+05	2.72E+04	3.39E+02	6.32E+04	1.46E+02	1.46E+02	1.68E+05	1.75E+06	6.28E+05	7.45E+02	4.77E+03	6.87E+02	9.72E+02	3.10E+01	1.12E+03	5.39E+02	1.40E+04	6.01E+04	2.72E+03	2.05E+02	4.65E+04	6.56E+03	2.84E+04	1.23E+03	2.96E+02	1.50E+03	4.12E+02	2.88E+03	1.32E+05	3.02E+03	1.18E+05	1.37E+04	8.73E+02	1.99E+03	1.06E+02	1.62E+05	7.60E+01	4.70E+02
AcV-111-2	SS	3.45E+03	1.04E+04	4.10E+01	4.65E+04	2.85E+04	8.94E+03	8.51E+04	2.91E+04	6.05E+04	9.63E+03	2.48E+05	5.53E+04	9.70E+02	1.55E+04	1.78E+02	1.66E+03	4.25E+04	1.46E+06	9.10E+05	1.29E+02	8.75E+03	1.68E+02	5.32E+03	1.70E+02	1.70E+02	4.35E+02	2.13E+04	2.01E+05	2.15E+03	2.48E+03	7.84E+04	3.39E+04	1.04E+05	7.44E+02	7.44E+02	4.24E+03	2.45E+03	8.10E+02	2.63E+05	5.07E+03	2.32E+05	5.36E+04	2.40E+02	9.48E+03	1.60E+03	2.69E+05	4.62E+03	1.98E+04
AcV-541-1	SS	2.20E+01	1.33E+04	1.28E+02	4.91E+04	4.30E+04	7.35E+03	4.94E+04	3.56E+04	4.44E+04	1.94E+04	7.06E+05	5.50E+04	7.50E+01	6.05E+04	7.44E+02	5.05E+02	8.56E+04	1.73E+06	2.37E+06	8.51E+02	6.96E+03	2.87E+03	2.94E+04	2.62E+03	9.67E+02	3.88E+04	1.28E+05	5.92E+04	1.28E+04	4.96E+03	7.81E+04	2.78E+04	2.79E+04	4.01E+03	1.10E+03	1.15E+03	1.47E+03	2.87E+03	1.25E+05	3.86E+03	2.33E+05	8.29E+03	7.49E+02	2.24E+03	2.48E+02	4.70E+05	1.60E+03	5.84E+02
AcV-411-4	SS	2.06E+03	1.25E+02	1.25E+02	6.35E+04	3.20E+04	4.38E+03	5.77E+04	4.23E+04	7.82E+04	1.15E+04	6.12E+05	4.22E+04	1.07E+02	1.24E+05	2.43E+02	2.43E+02	9.55E+04	3.42E+06	1.75E+06	6.60E+02	1.44E+02	1.44E+02	5.95E+03	3.03E+03	1.87E+03	6.79E+03	8.81E+04	3.77E+04	9.84E+02	3.27E+03	5.06E+04	1.21E+04	1.29E+04	5.78E+02	5.78E+02	5.78E+02	2.57E+02	2.57E+02	3.17E+05	2.60E+02	2.35E+05	1.73E+04	6.62E+02	6.62E+02	6.62E+02	2.91E+05	2.91E+03	1.22E+04
AcV-311-2	SS	1.84E+03	1.02E+02	1.02E+02	5.07E+04	5.17E+04	4.32E+02	8.76E+04	3.97E+04	6.70E+04	3.17E+04	3.56E+05	4.13E+04	2.28E+03	2.28E+02	2.00E+02	2.57E+03	8.10E+04	1.63E+06	1.57E+06	1.09E+03	2.71E+03	8.30E+01	6.43E+03	5.32E+02	5.32E+02	1.79E+04	7.17E+04	4.50E+04	9.25E+02	7.35E+02	9.34E+04	5.59E+04	2.06E+04	7.63E+02	7.63E+02	7.63E+02	1.33E+02	1.33E+02	4.80E+05	7.96E+02	2.49E+05	8.64E+03	1.26E+02	1.26E+02	1.26E+02	5.19E+05	1.08E+02	1.87E+02
AcV-231-5	SS	2.60E+03	9.31E+03	1.12E+02	3.35E+04	4.41E+04	6.34E+03	8.66E+04	1.84E+04	3.16E+04	8.37E+03	4.02E+05	4.18E+04	1.23E+03	1.94E+04	5.86E+02	4.25E+03	9.44E+04	1.35E+06	2.21E+06	3.55E+02	1.87E+04	9.73E+02	7.13E+03	2.53E+02	1.05E+02	3.14E+04	5.04E+04	1.09E+05	1.31E+02	1.31E+02	1.11E+05	1.44E+04	4.16E+04	6.54E+02	1.20E+04	4.77E+03	6.08E+03	1.01E+02	2.22E+05	1.73E+03	1.81E+05	3.35E+04	4.46E+03	4.95E+02	9.51E+02	3.48E+05	1.81E+03	3.03E+03
AcV-341-1	SS-N	5.82E+02	3.14E+03	5.82E+02	4.45E+04	3.93E+04	5.30E+02	5.18E+04	5.69E+04	4.10E+04	1.94E+02	2.66E+05	1.35E+04	7.80E+01	5.43E+03	1.21E+02	1.81E+03	9.96E+04	1.87E+06	1.37E+06	4.00E+02	2.07E+02	2.07E+02	2.11E+03	4.27E+02	4.27E+02	6.85E+03	5.77E+04	5.46E+04	8.01E+02	8.01E+02	8.14E+04	2.28E+04	1.84E+04	8.00E+00	5.32E+03	1.53E+02	1.32E+02	1.32E+02	5.66E+05	5.12E+02	2.31E+05	5.73E+03	1.35E+03	7.31E+03	2.60E+02	2.68E+05	3.25E+02	8.11E+03
AcV-631-1	SS-N	9.94E+02	8.07E+03	2.70E+01	4.41E+04	3.21E+04	3.25E+03	4.45E+04	3.35E+04	3.30E+04	2.42E+04	5.10E+05	6.62E+04	2.10E+03	2.83E+04	6.12E+02	3.09E+03	1.26E+05	2.31E+06	2.62E+06	5.34E+02	6.27E+03	7.65E+02	1.41E+04	5.47E+03	7.56E+02	3.57E+04	4.17E+04	3.15E+04	2.40E+02	2.40E+02	1.01E+05	1.77E+04	2.61E+04	1.71E+02	2.03E+04	3.59E+02	6.79E+02	6.79E+02	2.23E+05	3.82E+03	1.96E+05	1.38E+04	1.38E+03	2.53E+03	4.20E+01	4.25E+05	2.49E+03	8.33E+03
AcV-121-2	SS-N	3.77E+03	8.00E+03	3.60E+01	3.87E+04	4.14E+04	4.62E+03	5.38E+04	5.15E+04	4.24E+04	1.69E+04	3.70E+05	2.81E+04	1.43E+03	3.17E+04	5.92E+02	1.11E+02	8.08E+04	2.37E+06	1.35E+06	1.57E+02	2.80E+03	8.93E+02	2.36E+03	1.27E+02	3.91E+03	5.49E+03	3.00E+04	4.40E+04	5.24E+03	4.60E+01	6.42E+04	9.02E+03	1.11E+04	1.76E+02	1.76E+02	1.76E+02	2.01E+03	1.81E+03	3.85E+05	4.49E+02	1.75E+05	1.87E+04	1.19E+03	2.25E+03	1.30E+03	3.37E+05	8.20E+01	3.70E+03
AcV-241-2	SS-N	5.04E+02	4.28E+03	3.50E+03	3.59E+04	2.77E+04	7.43E+02	5.93E+04	3.63E+04	3.46E+04	4.60E+03	4.16E+05	4.59E+04	4.75E+03	1.76E+04	6.74E+02	1.16E+02	9.29E+04	2.31E+06	2.44E+06	4.97E+02	3.89E+03	5.44E+02	1.01E+04	4.44E+03	4.26E+03	3.60E+04	4.56E+04	8.17E+04	2.79E+02	8.04E+02	7.39E+04	1.79E+04	3.04E+04	1.44E+02	3.98E+03	1.36E+02	9.86E+02	2.15E+03	2.23E+05	1.81E+03	1.68E+05	1.31E+04	9.48E+02	2.19E+03	8.22E+02	3.94E+05	2.31E+03	3.03E+03
AcV-341-3	SS-N	6.98E+03	5.34E+02	5.34E+02	3.57E+04	2.79E+04	1.03E+02	5.15E+04	5.95E+04	4.98E+04	1.19E+02	2.86E+05	1.32E+04	5.40E+02	3.08E+04	3.49E+02	1.02E+03	6.34E+04	1.65E+06	1.16E+06	4.70E+01	3.29E+02	3.29E+02	5.93E+03	1.70E+01	1.70E+01	1.97E+04	3.34E+04	3.24E+04	3.06E+02	3.06E+02	7.34E+04	2.39E+04	4.04E+04	1.13E+02	4.99E+03	1.37E+02	3.03E+02	3.03E+02	5.23E+05	8.01E+03	2.37E+05	6.90E+03	1.43E+03	3.00E+01	3.00E+01	2.75E+05	4.35E+02	8.20E+03
AcV-251-2	SS-N	6.24E+02	6.38E+03	6.47E+02	4.20E+04	6.88E+04	4.36E+03	5.50E+04	2.23E+04	5.80E+04	7.29E+03	6.17E+05	4.31E+04	1.34E+02	5.05E+04	1.69E+02	2.34E+03	1.28E+05	1.96E+06	2.69E+06	3.23E+02	1.25E+02	1.25E+02	3.51E+04	9.72E+02	1.91E+03	3.07E+04	1.19E+05	8.12E+04	6.41E+02	6.41E+02	7.38E+04	3.69E+04	3.76E+04	1.17E+02	1.17E+02	1.17E+02	8.00E+03	3.35E+02	1.28E+05	2.64E+02	2.31E+05	1.41E+04	2.58E+03	3.18E+03	4.35E+02	5.11E+05	3.18E+03	7.55E+03
AcV-311-3	SS-N	2.11E+02	6.37E+03	2.77E+03	4.72E+04	2.89E+04	4.55E+03	8.66E+04	5.86E+04	4.12E+04	9.73E+03	3.71E+05	3.66E+04	3.79E+02	2.08E+04	6.69E+02	2.06E+03	7.53E+04	1.46E+06	1.77E+06	7.88E+02	5.48E+03	1.46E+02	5.04E+03	3.72E+03	9.72E+02	2.40E+04	6.44E+04	7.07E+04	2.12E+03	5.98E+02	9.34E+04	4.65E+04	3.52E+04	4.10E+01	1.74E+03	1.23E+02	6.47E+02	6.47E+02	3.81E+05	3.36E+03	2.45E+05	8.58E+03	9.81E+02	7.37E+03	5.75E+03	4.27E+05	7.49E+03	3.46E+02
AcV-231-4	SS-N	8.22E+02	6.15E+03	1.99E+02	2.79E+04	3.51E+04	7.20E+03	9.17E+04	2.42E+04	3.24E+04	4.32E+03	4.01E+05	4.32E+04	5.40E+01	3.37E+04	3.92E+02	4.34E+03	8.64E+04	1.36E+06	2.15E+06	7.71E+02	1.32E+04	5.99E+02	7.24E+03	4.20E+01	2.74E+03	4.41E+04	5.93E+04	1.02E+05	2.09E+03	5.63E+02	8.64E+04	1.52E+04	6.77E+04	2.79E+03	1.51E+04	5.25E+03	2.76E+03	2.35E+03	1.98E+05	3.66E+03	1.72E+05	3.76E+04	9.71E+03	5.61E+03	5.43E+03	3.48E+05	2.00E+03	3.98E+03
AcV-541-2	SS-N	1.11E+02	2.83E+03	3.39E+03	5.71E+04	4.72E+04	2.78E+03	5.39E+04	3.39E+04	6.34E+04	5.71E+03	6.99E+05	6.35E+04	3.73E+03	9.62E+04	8.50E+01	1.27E+03	1.46E+05	1.81E+06	2.31E+06	7.05E+02	2.97E+03	9.37E+02	8.51E+04	5.88E+03	1.24E+03	4.22E+04	1.39E+05	4.79E+04	1.49E+02	1.15E+02	8.73E+04	4.48E+04	2.46E+04	7.85E+02	7.85E+02	7.85E+02	1.63E+02	1.63E+02	1.18E+05	4.67E+02	2.78E+05	1.68E+04	7.70E+02	5.60E+03	3.92E+02	4.68E+05	2.52E+02	2.06E+04
AcV-621-2	SS-N	1.29E+02	1.15E+04	7.80E+01	4.18E+04	5.67E+04	8.10E+02	6.03E+04	4.27E+04	4.36E+04	2.19E+04	4.90E+05	4.81E+04	5.65E+02	2.40E+04	1.41E+02	1.41E+02	1.22E+05	2.67E+06	2.57E+06	6.50E+02	2.88E+03	1.10E+02	6.63E+03	3.49E+03	5.00E+02	4.04E+04	3.30E+04	3.70E+04	7.97E+02	1.33E+03	8.25E+04	2.51E+04	1.13E+04	4.23E+02	1.28E+04	2.18E+03	2.20E+03	6.24E+02	2.59E+05	5.91E+03	1.59E+05	8.46E+03	5.57E+02	1.20E+02	2.74E+03	4.20E+05	1.59E+02	3.84E+03
AcV-441-4	SS-N	5.18E+03	2.01E+03	1.54E+02	5.99E+04	4.64E+04	9.37E+03	5.69E+04	2.79E+04	5.09E+04	6.54E+03	4.23E+05	3.12E+04	8.76E+02	3.71E+04	2.16E+02	2.32E+03	1.20E+05	1.81E+06	2.11E+06	7.95E+02	2.79E+03	6.75E+02	1.39E+04	1.74E+02	1.74E+02	8.13E+03	7.13E+04	4.72E+04	6.56E+03	5.09E+02	6.51E+04	2.61E+04	1.11E+04	4.70E+02	4.70E+02	4.70E+02	2.07E+02	4.90E+03	3.19E+05	1.89E+02	2.12E+05	1.11E+04	2.00E+01	3.76E+03	2.31E+02	5.22E+05	3.24E+03	6.53E+03
AcV-111-4	SS-N	8.87E+03	4.26E+03	1.54E+03	2.69E+04	3.10E+04	2.35E+03	5.73E+04	5.11E+04	6.05E+04	9.02E+03	1.70E+05	2.93E+04	9.12E+02	7.66E+02	3.89E+02	1.75E+03	8.66E+04	1.50E+06	7.48E+05	5.65E+02	1.77E+04	4.65E+02	9.11E+03	3.15E+03	7.46E+02	1.02E+04	1.13E+04	1.17E+05	9.20E+02	5.52E+03	6.31E+04	1.91E+04	6.87E+04	2.21E+02	2.21E+02	2.21E+02	1.06E+02	1.06E+02	2.75E+05	5.58E+03	2.24E+05	5.18E+04	1.50E+03	2.48E+03	4.59E+03	1.96E+05	1.40E+02	8.93E+03
AcV-351-3	SS-N	7.04E+02	3.74E+03	3.40E+01	6.09E+04	5.21E+04	5.10E+04	7.79E+04	4.81E+04	1.60E+04	5.18E+03	5.24E+05	5.01E+04	4.27E+03	3.33E+04	7.00E+00	1.46E+03	4.33E+04	1.84E+06	2.74E+06	4.00E+00	1.86E+03	3.30E+01	1.81E+04	1.42E+02	2.49E+03	3.20E+04	5.71E+04	1.02E+05	9.36E+03	1.18E+03	1.91E+05	2.32E+04	5.10E+04	3.08E+03	5.99E+03	1.58E+03	4.36E+03	2.79E+03	5.89E+05	3.57E+02	2.62E+05	3.77E+04	1.68E+03	1.13E+04	6.13E+03	7.41E+05	2.46E+03	3.16E+03
AcV-531-1	SS-N	7.04E+03	4.20E+03	2.10E+02	3.02E+04	5.51E+04	2.49E+02	5.89E+03	6.24E+04	3.50E+04	2.71E+04	4.06E+05	7.27E+03	8.80E+01	6.81E+03	3.09E+02	3.09E+02	2.69E+05	2.30E+06	1.80E+06	4.88E+02	2.21E+02	2.21E+02	2.61E+04	5.21E+03	5.76E+03	2.46E+04	5.42E+04	9.94E+03	1.23E+02	1.23E+02	5.78E+04	5.78E+03	1.26E+02	1.26E+02	1.26E+02	1.26E+02	1.66E+02	1.66E+02	3.00E+05	3.81E+03	1.49E+05	2.77E+03	1.35E+02	1.35E+02	1.35E+02	4.75E+05	3.04E+02	9.89E+03
AcV-421-5	SS-N	6.68E+02	6.68E+02	6.68E+02	4.01E+04	1.90E+04	3.62E+03	4.09E+04	7.32E+04	4.13E+04	5.11E+02	4.99E+05	2.32E+04	4.69E+02	2.86E+04	4.71E+02	2.03E+03	8.03E+04	2.44E+06	2.48E+06	6.50E+01	3.46E+03	1.01E+02	1.11E+04	8.00E+01	5.91E+03	2.80E+04	6.31E+04	1.09E+05	5.72E+03	1.88E+02	1.05E+05	1.78E+04	7.89E+04	4.15E+02	5.72E+03	3.58E+02	2.81E+02	3.81E+03	3.69E+05	1.31E+03	1.99E+05	2.70E+04	2.74E+03	6.90E+03	1.63E+02	3.92E+05	2.14E+02	1.64E+02
AcV-151-5	SS-N	4.00E+02	4.00E+02	1.85E+03	6.70E+04	4.70E+04	7.83E+03	5.63E+04	4.25E+04	3.36E+04	1.00E+04	6.30E+05	4.51E+04	2.96E+03	2.81E+04	4.86E+02	3.03E+03	8.56E+04	1.64E+06	3.00E+06	7.91E+02	5.77E+02	5.77E+02	7.87E+03	3.16E+03	4.53E+03	4.46E+04	6.44E+04	6.40E+04	1.88E+02	3.90E+01	1.17E+05	1.84E+04	3.86E+04	1.30E+02	7.96E+03	3.90E+03	2.62E+03	4.73E+02	2.60E+05	2.60E+01	2.30E+05	1.88E+04	1.90E+03	4.58E+03	2.90E+03	5.10E+05	2.06E+02	1.40E+02
AcV-511-3	SS-N	1.69E+04	1.61E+02	1.61E+02	5.38E+04	3.56E+04	1.81E+02	2.22E+04	6.72E+04	3.10E+04	1.55E+02	4.52E+05	9.21E+03	4.71E+03	2.33E+04	3.10E+02	1.68E+03	2.51E+05	3.31E+06	2.38E+06	9.85E+02	1.01E+02	1.01E+02	1.76E+04	2.80E+03	3.89E+02	3.52E+04	4.76E+04	8.03E+03	1.11E+02	8.81E+02	6.41E+04	1.06E+04	7.39E+02	7.39E+02	7.39E+02	7.39E+02	7.39E+02	7.39E+02	4.03E+05	7.60E+03	2.15E+05	4.49E+03	8.40E+02	1.24E+02	1.24E+02	4.13E+05	2.10E+02	2.19E+04
AcV-451-2	SS-N	7.57E+02	3.37E+03	2.66E+03	5.86E+04	4.50E+04	3.85E+02	9.16E+04	5.47E+04	3.58E+04	2.48E+04	7.38E+05	4.53E+04	1.04E+02	7.03E+04	1.08E+03	1.83E+03	1.43E+05	2.74E+06	2.87E+06	1.15E+02	1.87E+02	1.87E+02	5.79E+03	2.28E+03	3.76E+03	4.81E+04	1.51E+05	4.32E+04	2.43E+03	2.32E+02	8.75E+04	2.45E+04	1.44E+04	6.08E+02	1.41E+04	1.99E+03	1.78E+02	1.78E+02	4.07E+05	2.96E+03	2.49E+05	1.10E+04	2.72E+03	5.45E+03	5.80E+02	4.44E+05	6.43E+02	4.01E+03
AcV-131-5	SS-N	4.50E+03	2.17E+03	7.49E+02	7.55E+04	4.15E+04	6.89E+03	5.04E+04	3.70E+04	4.71E+04	1.40E+04	5.38E+05	3.78E+04	8.01E+02	4.78E+04	5.49E+02	4.77E+02	1.08E+05	2.45E+06	3.53E+06	1.19E+02	4.21E+03	3.48E+02	5.50E+03	1.32E+03	1.02E+04	7.45E+04	6.14E+04	8.79E+04	4.50E+03	4.12E+03	7.33E+04	1.36E+04	4.21E+04	9.43E+02	2.77E+03	5.91E+02	7.49E+03	1.69E+02	2.47E+05	2.23E+03	1.77E+05	2.93E+04	2.57E+03	7.61E+03	5.00E+01	4.11E+05	7.93E+02	3.01E+02
AcV-141-1	SS-N	3.30E+01	3.30E+01	3.30E+01	3.22E+04	3.65E+04	5.25E+03	4.25E+04	2.44E+04	4.23E+04	4.49E+03	3.87E+05	2.96E+04	1.43E+02	2.38E+04	1.25E+02	7.50E+02	9.66E+04	1.89E+06	2.04E+06	2.08E+02	2.95E+02	1.18E+02	3.65E+03	4.59E+03	4.15E+03	3.33E+04	4.27E+04	5.48E+04	4.81E+03	2.32E+02	3.93E+04	2.33E+04	3.28E+04	3.88E+02	3.88E+02	3.88E+02	5.39E+02	1.56E+03	2.44E+05	9.14E+02	1.60E+05	1.34E+04	1.05E+03	2.67E+03	1.61E+03	3.60E+05	1.89E+03	6.53E+03
AcV-611-1	SS-N	5.34E+03	1.37E+03	2.07E+03	5.95E+04	7.72E+04	3.21E+03	6.66E+04	3.91E+04	5.07E+04	2.34E+04	5.34E+05	4.78E+04	3.04E+02	6.18E+04	6.20E+02	1.14E+03	1.78E+05	2.61E+06	1.79E+06	1.31E+02	8.76E+02	8.76E+02	4.29E+04	8.10E+03	1.04E+04	2.89E+04	1.33E+05	4.37E+04	1.42E+02	1.13E+02	9.87E+04	3.03E+04	1.41E+04	2.91E+02	4.98E+03	7.83E+02	2.41E+03	8.00E+00	1.33E+05	1.33E+02	2.20E+05	5.80E+03	1.00E+03	3.01E+03	1.25E+02	3.90E+05	9.24E+02	1.03E+04
AcV-431-4	SS-N	2.54E+03	3.80E+03	6.26E+02	4.89E+04	4.54E+04	2.39E+03	6.95E+04	3.32E+04	2.29E+04	1.07E+04	3.98E+05	2.74E+04	7.04E+02	2.09E+04	2.44E+02	1.08E+03	8.11E+04	1.88E+06	1.94E+06	1.41E+02	4.37E+02	4.37E+02	1.97E+04	1.79E+02	9.06E+02	3.24E+04	8.37E+04	3.34E+04	2.98E+03	1.11E+02	5.55E+04	2.90E+04	1.72E+04	2.47E+03	5.70E+03	1.59E+02	9.65E+02	9.65E+02	2.72E+05	1.02E+03	1.71E+05	4.75E+03	3.26E+02	3.19E+03	1.95E+02	4.19E+05	1.78E+02	6.88E+03
AcV-331-5	SS-N	3.11E+03	5.56E+03	7.42E+02	3.85E+04	3.82E+04	1.39E+02	3.95E+04	5.29E+04	3.82E+04	3.29E+03	4.48E+05	4.08E+04	4.52E+02	1.01E+04	1.28E+02	9.59E+02	6.61E+04	1.94E+06	2.11E+06	5.52E+02	5.52E+02	5.52E+02	4.13E+03	8.40E+01	3.60E+03	3.35E+04	3.95E+04	6.61E+04	5.94E+02	2.37E+03	6.29E+04	6.07E+03	4.21E+04	3.53E+02	1.36E+03	3.02E+03	3.87E+03	9.10E+02	2.95E+05	3.58E+03	1.58E+05	3.23E+04	9.39E+02	3.14E+03	3.92E+02	3.42E+05	2.01E+03	3.73E+03
AcV-321-4	SS-N	3.37E+02	2.48E+03	3.37E+02	4.32E+04	6.05E+04	2.02E+02	5.24E+04	3.81E+04	3.11E+04	9.05E+03	4.53E+05	3.21E+04	3.44E+03	2.06E+04	1.61E+03	2.05E+03	8.49E+04	1.71E+06	2.31E+06	2.31E+02	3.61E+03	7.10E+01	5.14E+03	1.84E+03	8.52E+03	3.10E+04	8.90E+04	3.03E+04	2.65E+03	5.21E+02	7.44E+04	3.89E+04	1.17E+04	1.16E+02	1.16E+02	1.16E+02	4.92E+02	4.92E+02	3.59E+05	4.84E+03	2.15E+05	1.42E+04	8.23E+02	8.23E+02	8.23E+02	5.58E+05	9.21E+03	1.86E+02
AcV-211-4	SS-N	6.36E+03	3.78E+03	2.20E+02	6.09E+04	4.76E+04	3.03E+03	5.74E+04	2.87E+04	3.30E+04	7.67E+03	4.68E+05	2.99E+04	1.71E+03	4.41E+04	1.29E+03	2.02E+03	9.80E+04	2.34E+06	2.62E+06	2.00E+02	7.36E+03	2.85E+02	1.18E+04	5.95E+03	2.23E+03	4.71E+04	6.74E+04	6.19E+04	2.14E+02	2.14E+02	9.39E+04	2.04E+04	3.37E+04	4.80E+02	9.70E+01	1.66E+03	4.20E+03	1.08E+02	1.99E+05	6.38E+03	1.92E+05	2.42E+04	2.48E+03	2.05E+02	2.05E+02	4.59E+05	5.19E+02	1.88E+03
AcV-411-5	SS-N	2.43E+02	2.43E+02	2.43E+02	6.43E+04	2.85E+04	1.00E+02	2.79E+04	4.70E+04	1.35E+04	2.88E+04	5.97E+05	1.28E+04	2.17E+02	8.47E+04	2.66E+03	8.88E+02	1.01E+05	3.10E+06	1.72E+06	6.39E+02	3.26E+02	3.26E+02	2.81E+03	1.53E+04	8.99E+02	2.27E+04	8.07E+04	3.80E+04	1.89E+02	2.46E+02	9.53E+04	2.42E+04	2.45E+04	1.13E+02	1.13E+02	1.13E+02	1.13E+02	2.13E+03	3.38E+05	1.97E+03	2.77E+05	1.23E+04	2.76E+02	2.76E+02	5.68E+03	3.60E+05	1.31E+02	3.30E+03
AcV-521-3	SS-N	2.38E+02	1.54E+04	2.05E+03	6.41E+04	6.00E+04	3.42E+03	8.77E+04	3.05E+04	6.07E+04	2.22E+04	1.02E+06	7.43E+04	8.87E+03	2.42E+05	1.07E+02	4.85E+03	1.68E+05	2.49E+06	1.14E+06	6.25E+02	3.56E+03	9.77E+02	2.89E+04	7.44E+03	1.62E+04	5.48E+03	9.19E+04	6.25E+04	3.96E+02	1.90E+01	1.16E+05	1.59E+04	4.07E+04	2.47E+02	1.30E+04	7.54E+03	2.89E+03	1.63E+02	1.72E+05	2.47E+02	3.07E+05	1.97E+04	4.70E+03	1.62E+04	2.42E+03	4.51E+05	3.73E+03	4.51E+02
AcV-221-1	SS-N	2.03E+03	1.18E+02	1.18E+02	2.90E+04	5.70E+04	9.28E+03	5.82E+04	2.36E+04	2.60E+04	3.97E+03	4.67E+05	4.27E+04	3.74E+03	1.71E+04	9.03E+02	8.04E+03	8.73E+04	1.57E+06	2.51E+06	6.23E+02	4.33E+03	9.26E+02	7.76E+03	3.17E+03	2.74E+03	4.03E+04	5.43E+04	7.40E+04	1.40E+04	3.03E+03	7.49E+04	1.64E+04	5.86E+04	2.87E+03	3.83E+03	7.60E+01	5.41E+02	5.71E+03	2.24E+05	2.18E+03	1.78E+05	3.10E+04	4.78E+03	6.38E+03	6.70E+01	5.28E+05	2.23E+02	2.12E+03
AcV-241-3	SS-Q	5.03E+03	1.26E+02	6.18E+03	4.85E+04	2.90E+04	2.09E+03	6.64E+04	4.00E+04	3.85E+04	6.20E+02	4.62E+05	2.13E+04	2.29E+03	2.66E+04	1.08E+02	9.08E+02	9.57E+04	1.89E+06	2.48E+06	2.57E+02	2.71E+03	4.57E+02	1.38E+04	5.07E+03	1.23E+03	4.51E+04	6.34E+04	5.62E+04	1.44E+02	3.05E+03	8.69E+04	7.92E+03	1.57E+04	1.14E+02	4.49E+03	6.65E+02	3.66E+03	7.68E+02	2.90E+05	6.60E+02	1.68E+05	7.62E+03	9.80E+02	2.04E+03	5.17E+03	3.76E+05	6.59E+02	6.84E+03
AcV-411-1	SS-Q	1.30E+03	2.52E+03	2.92E+03	4.58E+04	2.58E+04	4.26E+02	7.81E+04	3.87E+04	3.89E+04	3.14E+04	6.24E+05	2.95E+04	2.88E+03	1.34E+05	8.30E+02	1.76E+03	9.27E+04	2.79E+06	1.54E+06	1.01E+02	2.09E+02	2.09E+02	4.42E+03	2.43E+02	9.33E+03	1.73E+04	7.09E+04	4.67E+04	2.78E+03	8.51E+02	9.25E+04	3.37E+04	4.70E+04	1.61E+02	1.61E+02	1.61E+02	9.94E+02	9.94E+02	3.11E+05	1.33E+03	2.45E+05	2.32E+04	7.21E+02	6.10E+03	2.41E+03	3.82E+05	1.18E+02	1.17E+04
AcV-451-5	SS-Q	4.79E+03	1.06E+04	9.60E+01	4.61E+04	4.21E+04	2.08E+03	9.53E+04	4.17E+04	4.34E+04	1.01E+04	5.22E+05	4.27E+04	2.62E+02	1.50E+04	1.27E+03	5.11E+02	1.02E+05	2.05E+06	2.48E+06	1.98E+02	3.65E+03	2.14E+02	4.23E+03	5.50E+01	8.18E+02	2.14E+04	7.93E+04	3.04E+04	3.01E+02	4.27E+03	1.10E+05	4.86E+04	2.03E+04	2.49E+02	2.49E+02	2.49E+02	4.21E+03	9.25E+02	3.62E+05	4.23E+03	2.38E+05	1.21E+04	3.02E+02	4.82E+03	2.10E+02	6.90E+05	1.75E+02	4.30E+03
AcV-351-2	SS-Q	3.07E+03	8.44E+03	1.14E+02	7.54E+04	5.30E+04	6.14E+02	8.66E+04	3.72E+04	4.47E+04	1.45E+04	6.03E+05	4.97E+04	3.71E+03	2.69E+04	9.26E+02	2.26E+03	1.36E+05	2.32E+06	3.21E+06	5.83E+02	2.95E+02	2.95E+02	6.62E+03	1.37E+03	8.00E+03	6.60E+04	9.44E+04	1.97E+04	3.46E+02	3.46E+02	1.05E+05	5.22E+04	8.07E+03	8.60E+01	5.64E+03	1.35E+02	3.00E+02	3.00E+02	4.18E+05	4.27E+03	2.45E+05	3.12E+03	1.04E+03	4.11E+03	3.82E+03	5.06E+05	4.11E+03	6.68E+02
AcV-531-5	SS-Q	3.27E+03	3.38E+03	7.10E+01	4.31E+04	2.92E+04	5.35E+03	2.17E+04	4.11E+04	2.78E+04	9.39E+02	3.67E+05	2.06E+04	2.51E+03	1.26E+04	5.66E+02	5.66E+02	2.44E+05	2.13E+06	1.92E+06	1.57E+02	3.63E+02	1.69E+02	9.46E+03	5.43E+03	1.58E+03	2.21E+04	7.48E+04	2.66E+04	1.93E+02	4.39E+03	7.96E+04	1.25E+04	8.28E+03	1.21E+02	4.02E+03	5.07E+02	9.24E+02	1.10E+03	2.76E+05	2.76E+03	2.49E+05	8.51E+03	4.87E+02	2.84E+03	1.17E+02	4.60E+05	2.15E+02	8.34E+03
AcV-431-2	SS-Q	4.62E+03	4.20E+03	1.36E+02	4.42E+04	2.86E+04	6.61E+02	5.70E+04	3.75E+04	2.61E+04	4.84E+02	4.31E+05	4.41E+04	4.35E+03	3.53E+04	6.35E+02	6.35E+02	8.53E+04	2.16E+06	1.99E+06	5.26E+02	2.02E+02	2.02E+02	1.21E+04	1.21E+02	1.21E+02	1.13E+04	8.65E+04	3.67E+04	7.29E+02	2.31E+03	1.09E+05	3.83E+04	3.10E+04	2.02E+03	5.44E+03	5.71E+02	8.11E+03	2.87E+03	3.19E+05	2.25E+03	2.29E+05	1.36E+04	5.82E+02	5.82E+02	5.23E+03	5.33E+05	2.47E+03	6.73E+03
AcV-631-3	SS-Q	2.65E+03	4.34E+03	1.37E+02	3.36E+04	3.25E+04	2.27E+02	5.10E+04	5.53E+04	4.48E+04	2.20E+04	3.46E+05	4.59E+04	1.09E+02	1.85E+04	7.53E+02	1.27E+03	1.21E+05	2.63E+06	2.10E+06	6.73E+02	5.34E+02	5.34E+02	8.92E+03	1.55E+03	7.64E+03	3.29E+04	4.12E+04	4.59E+04	1.75E+02	1.47E+02	8.17E+04	1.09E+04	3.03E+04	4.66E+02	6.83E+03	2.41E+02	3.88E+03	6.24E+02	2.38E+05	2.64E+03	1.78E+05	1.35E+04	9.09E+02	2.86E+02	6.14E+03	3.28E+05	4.80E+03	1.04E+04
AcV-251-4	SS-Q	1.54E+03	2.19E+03	3.34E+03	4.28E+04	6.66E+04	8.01E+03	5.85E+04	2.45E+04	4.43E+04	1.01E+04	5.27E+05	4.95E+04	1.05E+04	2.98E+04	7.30E+01	6.19E+03	1.07E+05	1.46E+06	2.15E+06	2.27E+02	2.38E+03	7.60E+01	3.61E+04	5.80E+01	5.80E+01	2.65E+04	8.75E+04	7.95E+04	1.31E+04	4.07E+03	6.62E+04	3.22E+04	3.97E+04	1.01E+03	6.70E+01	6.70E+01	1.36E+03	4.99E+03	8.89E+04	1.86E+03	2.04E+05	2.51E+04	1.53E+03	1.46E+03	4.42E+03	3.85E+05	6.57E+02	2.53E+02
AcV-541-3	SS-Q	3.31E+03	4.22E+03	3.33E+03	5.55E+04	3.53E+04	1.11E+04	8.08E+04	2.10E+04	5.25E+04	1.18E+04	7.89E+05	6.34E+04	9.43E+03	1.08E+05	3.11E+02	6.27E+03	1.12E+05	1.67E+06	2.16E+06	4.93E+02	6.40E+03	1.01E+03	3.38E+04	2.58E+03	6.76E+03	3.67E+04	1.03E+05	9.53E+04	1.07E+04	5.44E+02	1.44E+05	2.47E+04	4.61E+04	2.94E+03	1.85E+04	2.48E+03	4.10E+03	8.55E+03	9.43E+04	3.48E+03	2.73E+05	2.67E+04	4.00E+03	5.90E+03	8.40E+02	4.54E+05	3.97E+03	2.49E+03
AcV-131-3	SS-Q	7.70E+01	7.70E+01	3.00E+02	5.85E+04	3.58E+04	6.16E+03	7.18E+04	3.93E+04	4.79E+04	1.79E+04	6.06E+05	6.47E+04	5.00E+03	4.00E+04	1.93E+02	4.90E+03	8.00E+04	2.20E+06	2.74E+06	7.53E+02	9.87E+03	4.99E+02	1.67E+04	7.28E+03	9.52E+03	5.13E+04	5.43E+04	1.14E+05	8.57E+03	2.07E+03	6.48E+04	6.92E+03	5.62E+04	2.37E+03	4.71E+02	4.71E+02	1.56E+03	8.53E+03	2.38E+05	2.56E+03	2.02E+05	3.18E+04	3.52E+03	3.63E+03	1.08E+02	3.65E+05	4.02E+03	7.80E+01
AcV-341-4	SS-Q	4.04E+03	2.11E+02	4.98E+03	4.10E+04	2.17E+04	1.91E+02	2.44E+04	4.48E+04	8.88E+03	6.19E+02	2.04E+05	8.25E+03	7.92E+02	7.88E+03	1.07E+02	5.24E+02	7.87E+04	1.64E+06	1.12E+06	2.32E+02	2.32E+02	2.32E+02	4.26E+03	9.50E+01	9.50E+01	6.68E+03	2.78E+04	6.32E+04	3.50E+02	3.50E+02	7.05E+04	2.25E+04	1.65E+04	5.79E+02	5.79E+02	5.79E+02	2.44E+02	2.44E+02	5.10E+05	7.75E+03	2.14E+05	1.43E+04	2.43E+03	6.21E+02	1.02E+04	2.38E+05	4.34E+02	3.85E+03
AcV-211-3	SS-Q	6.00E+03	1.05E+04	2.85E+03	4.72E+04	3.66E+04	3.80E+02	7.59E+04	8.00E+04	2.61E+04	7.13E+03	4.92E+05	4.99E+04	7.70E+01	3.11E+04	2.21E+02	2.21E+02	9.26E+04	2.63E+06	1.91E+06	3.78E+02	2.92E+02	2.92E+02	4.75E+03	1.65E+02	8.83E+03	1.15E+04	3.67E+04	5.99E+04	3.83E+03	5.34E+02	7.87E+04	1.51E+04	3.70E+04	1.24E+02	2.93E+03	4.00E+03	3.13E+03	3.04E+03	3.66E+05	2.13E+03	2.26E+05	2.66E+04	1.36E+02	8.01E+03	8.39E+03	2.58E+05	2.14E+03	1.28E+04
AcV-111-1	SS-Q	4.02E+03	4.83E+03	7.24E+02	5.39E+04	4.38E+04	5.16E+03	9.12E+04	5.34E+04	4.42E+04	8.82E+03	1.84E+05	2.61E+04	6.74E+02	6.74E+02	3.29E+03	2.34E+03	8.23E+04	1.89E+06	1.09E+06	1.59E+02	1.12E+04	3.11E+02	6.41E+03	4.71E+03	2.67E+02	4.14E+03	4.48E+04	1.19E+05	1.88E+02	6.05E+03	7.32E+04	3.78E+04	6.05E+04	4.50E+02	4.50E+02	1.70E+02	1.06E+04	1.90E+03	2.31E+05	5.82E+02	2.50E+05	3.53E+04	1.73E+02	2.11E+04	1.29E+02	2.29E+05	1.79E+02	1.82E+04
AcV-611-2	SS-Q	4.36E+03	2.49E+03	5.08E+03	6.24E+04	1.19E+05	2.89E+03	5.78E+04	2.81E+04	5.49E+04	2.58E+04	5.87E+05	3.94E+04	3.74E+03	7.42E+04	1.83E+02	1.30E+03	1.17E+05	2.58E+06	1.88E+06	4.21E+02	5.57E+02	5.57E+02	3.82E+04	6.02E+03	7.85E+03	2.90E+04	1.25E+05	3.03E+04	5.65E+03	1.24E+03	1.08E+05	2.70E+04	2.85E+04	1.10E+02	1.03E+04	1.23E+03	1.44E+03	1.69E+03	1.41E+05	7.45E+02	2.74E+05	5.62E+03	4.85E+02	8.18E+03	1.42E+02	3.54E+05	2.13E+02	8.63E+02
AcV-331-3	SS-Q	5.44E+03	2.15E+02	5.96E+03	5.70E+04	3.95E+04	4.91E+02	6.58E+04	3.51E+04	3.99E+04	7.07E+03	4.28E+05	4.11E+04	2.50E+03	2.42E+04	2.81E+02	1.47E+03	8.44E+04	1.61E+06	2.42E+06	6.50E+02	4.30E+02	4.30E+02	3.95E+03	6.03E+03	3.67E+03	2.83E+04	4.15E+04	4.50E+04	3.42E+02	3.28E+03	6.71E+04	3.26E+04	2.65E+04	1.88E+02	1.88E+02	1.88E+02	5.89E+02	5.89E+02	2.93E+05	3.98E+03	1.65E+05	1.64E+04	4.31E+02	6.53E+03	8.17E+03	4.96E+05	3.81E+03	5.72E+03
AcV-511-2	SS-Q	9.51E+02	9.51E+02	9.51E+02	4.36E+04	6.07E+04	1.04E+02	1.57E+04	8.50E+04	2.89E+04	2.62E+04	3.96E+05	1.96E+04	5.74E+03	1.27E+04	1.36E+02	1.36E+02	2.15E+05	1.97E+06	2.13E+06	4.42E+02	3.71E+03	5.06E+03	1.83E+04	5.37E+02	2.29E+03	2.30E+04	4.41E+04	1.26E+04	2.43E+02	5.20E+03	5.84E+04	1.48E+04	2.66E+03	4.96E+02	4.96E+02	4.98E+03	2.09E+03	6.78E+02	2.45E+05	2.54E+02	1.61E+05	1.22E+03	5.63E+02	5.63E+02	5.63E+02	4.28E+05	9.68E+02	4.30E+03
AcV-441-3	SS-Q	4.71E+03	5.21E+02	5.21E+02	3.41E+04	6.53E+04	6.44E+02	4.11E+04	3.95E+04	3.63E+04	2.96E+03	3.72E+05	1.68E+04	1.58E+03	3.35E+04	5.70E+02	2.95E+02	1.19E+05	1.70E+06	2.07E+06	2.10E+01	1.81E+02	1.81E+02	1.13E+04	2.55E+03	1.18E+03	2.47E+04	5.02E+04	2.04E+04	1.56E+02	1.56E+02	4.97E+04	2.64E+04	7.44E+03	8.08E+02	1.65E+03	1.14E+02	2.99E+02	2.99E+02	3.39E+05	3.51E+02	2.04E+05	4.08E+03	1.38E+02	3.29E+03	1.52E+02	5.67E+05	1.97E+02	8.87E+03
AcV-311-5	SS-Q	3.47E+03	5.36E+03	1.54E+02	4.83E+04	3.78E+04	3.68E+02	7.22E+04	2.08E+04	5.55E+04	5.02E+03	3.44E+05	1.60E+04	2.53E+02	1.57E+04	2.07E+02	9.18E+02	1.04E+05	1.49E+06	1.74E+06	1.16E+02	2.02E+02	7.68E+02	1.56E+04	1.30E+02	1.30E+02	1.73E+04	6.29E+04	4.70E+04	2.03E+02	3.62E+02	6.46E+04	5.72E+04	2.38E+04	5.71E+02	3.29E+03	2.38E+02	1.58E+02	1.58E+02	4.32E+05	7.09E+03	2.49E+05	9.67E+03	4.14E+03	8.22E+03	6.73E+03	4.11E+05	2.41E+02	1.50E+03
AcV-141-2	SS-Q	2.84E+03	8.31E+02	2.49E+02	4.24E+04	4.51E+04	7.91E+03	4.13E+04	1.84E+04	2.12E+04	5.08E+03	4.88E+05	2.65E+04	2.65E+03	1.38E+04	1.11E+02	1.16E+03	8.61E+04	1.86E+06	2.14E+06	1.36E+02	4.68E+03	6.19E+02	7.81E+03	6.00E+00	3.56E+03	2.99E+04	4.01E+04	7.41E+04	2.52E+03	4.42E+02	7.81E+04	2.16E+04	3.64E+04	1.45E+03	3.30E+01	3.30E+01	1.25E+02	1.13E+03	2.74E+05	5.82E+02	1.59E+05	1.13E+04	1.00E+02	1.00E+02	1.06E+03	4.54E+05	8.03E+02	5.19E+03
AcV-231-1	SS-Q	2.07E+03	1.95E+04	1.60E+03	3.55E+04	4.88E+04	9.91E+02	7.74E+04	3.79E+04	4.22E+04	3.19E+03	3.72E+05	4.79E+04	1.06E+02	2.64E+04	7.10E+01	4.44E+03	1.03E+05	1.49E+06	1.82E+06	5.42E+02	1.18E+04	3.44E+02	8.90E+03	3.23E+03	3.66E+03	1.83E+04	2.75E+04	1.08E+05	9.25E+02	4.17E+03	9.60E+04	1.29E+04	5.25E+04	7.20E+02	7.52E+03	7.73E+02	2.55E+03	2.64E+02	2.36E+05	3.31E+03	1.94E+05	3.05E+04	4.87E+03	1.80E+01	5.40E+03	3.31E+05	5.60E+01	3.67E+03
AcV-421-4	SS-Q	8.95E+02	8.95E+02	1.73E+02	8.08E+04	4.81E+04	3.67E+03	3.98E+04	4.51E+04	3.05E+04	8.89E+03	5.79E+05	3.68E+04	4.52E+02	5.09E+04	2.78E+02	2.78E+02	9.25E+04	2.58E+06	3.14E+06	1.91E+02	1.92E+02	1.92E+02	1.29E+04	5.59E+02	3.88E+03	3.87E+04	7.90E+04	7.20E+04	1.10E+04	3.57E+03	7.31E+04	1.75E+04	4.22E+04	1.34E+02	1.21E+04	7.78E+02	7.78E+02	4.25E+03	3.73E+05	1.89E+02	2.15E+05	1.90E+04	1.04E+03	7.20E+01	6.31E+03	4.33E+05	2.16E+03	7.74E+03
AcV-521-5	SS-Q	2.29E+03	6.40E+03	1.98E+03	5.68E+04	6.57E+04	7.57E+02	6.06E+04	7.58E+04	5.67E+04	3.34E+04	5.70E+05	5.49E+04	1.57E+02	7.07E+04	6.13E+02	9.60E+01	2.96E+05	2.45E+06	2.21E+06	5.20E+02	5.20E+02	5.20E+02	2.68E+04	3.15E+03	4.20E+03	2.82E+04	1.04E+05	3.33E+04	5.68E+02	4.15E+03	8.94E+04	9.53E+03	1.86E+04	5.62E+02	5.73E+03	4.05E+02	7.01E+02	7.01E+02	1.58E+05	4.06E+03	1.75E+05	1.33E+04	9.49E+02	6.31E+03	8.85E+02	4.81E+05	2.75E+03	3.92E+03
AcV-221-4	SS-Q	2.97E+03	1.75E+03	3.83E+02	4.32E+04	6.78E+04	1.29E+04	5.85E+04	2.46E+04	2.81E+04	2.86E+03	4.12E+05	2.76E+04	2.10E+03	2.41E+04	7.48E+02	3.05E+03	1.08E+05	1.83E+06	2.41E+06	9.72E+02	9.00E+00	9.00E+00	1.98E+03	2.52E+03	2.16E+03	3.33E+04	6.66E+04	7.20E+04	1.18E+04	4.45E+02	7.69E+04	1.54E+04	3.61E+04	4.25E+03	4.90E+02	2.38E+03	3.30E+03	5.48E+03	2.09E+05	2.46E+03	1.62E+05	1.92E+04	2.85E+03	1.79E+02	2.14E+03	4.95E+05	4.79E+03	5.99E+03
AcV-621-4	SS-Q	9.22E+02	3.56E+03	5.78E+02	5.19E+04	5.37E+04	3.63E+02	5.26E+04	4.80E+04	4.27E+04	2.00E+04	5.54E+05	4.82E+04	8.53E+03	4.11E+04	7.23E+02	4.80E+03	1.30E+05	2.74E+06	2.63E+06	1.43E+03	1.08E+04	6.50E+01	2.74E+03	9.95E+02	7.25E+03	4.16E+04	4.23E+04	3.83E+04	2.16E+03	9.07E+02	1.02E+05	2.03E+04	3.31E+04	2.11E+02	5.20E+03	1.12E+02	2.48E+03	7.74E+02	2.88E+05	3.43E+03	2.12E+05	1.74E+04	3.07E+03	1.52E+03	2.68E+03	6.26E+05	2.17E+03	2.04E+02
AcV-121-4	SS-Q	6.67E+03	2.00E+02	2.00E+02	6.26E+04	6.30E+04	2.59E+03	5.75E+04	6.09E+04	2.49E+04	4.47E+04	4.76E+05	3.60E+04	1.76E+02	5.86E+03	8.24E+02	8.24E+02	1.41E+05	3.09E+06	2.08E+06	1.36E+02	3.90E+03	4.64E+02	5.52E+03	1.35E+04	9.64E+03	2.04E+04	2.43E+04	7.75E+04	8.88E+03	1.97E+02	8.59E+04	9.09E+03	3.43E+04	1.48E+03	8.09E+03	3.39E+03	2.05E+02	4.29E+03	4.58E+05	4.13E+03	2.68E+05	2.00E+04	5.80E+02	1.64E+03	2.65E+03	6.25E+05	1.91E+03	1.20E+04
AcV-321-1	SS-Q	3.19E+03	1.16E+02	9.25E+02	3.01E+04	4.26E+04	7.57E+03	8.96E+04	1.16E+04	3.50E+04	1.63E+04	4.76E+05	4.38E+04	6.18E+03	2.20E+04	3.46E+02	2.90E+03	6.57E+04	2.12E+06	2.52E+06	6.39E+02	3.80E+02	3.80E+02	2.36E+03	1.59E+02	6.08E+03	4.49E+04	5.22E+04	3.28E+04	3.37E+03	2.45E+03	6.91E+04	3.72E+04	3.86E+04	3.05E+03	8.98E+03	1.57E+02	2.01E+03	3.67E+03	4.09E+05	4.98E+03	2.41E+05	1.40E+04	4.39E+03	1.55E+02	1.55E+02	5.45E+05	2.70E+02	5.84E+02
AcV-151-3	SS-Q	6.34E+03	4.62E+03	2.37E+03	5.70E+04	4.49E+04	8.95E+03	6.87E+04	4.16E+04	4.12E+04	5.92E+03	4.67E+05	4.92E+04	6.50E+02	2.85E+04	4.52E+02	8.59E+03	7.21E+04	1.79E+06	2.34E+06	5.90E+02	8.36E+03	8.29E+02	7.15E+03	5.60E+03	6.66E+03	3.30E+04	5.28E+04	1.43E+05	1.26E+04	8.01E+02	1.21E+05	1.19E+04	7.43E+04	4.16E+03	1.31E+04	1.10E+04	5.87E+03	7.57E+03	3.35E+05	8.22E+02	2.32E+05	3.73E+04	8.43E+03	3.45E+03	6.19E+02	6.05E+05	1.58E+03	4.75E+03
AcV-131-2	5	6.70E+02	5.70E+03	1.48E+03	3.77E+04	4.08E+04	1.47E+04	5.07E+04	5.54E+04	3.45E+04	3.76E+03	4.66E+05	5.83E+04	5.03E+03	2.66E+04	2.28E+02	3.79E+03	1.02E+05	1.97E+06	2.17E+06	4.42E+02	1.39E+04	1.00E+01	1.09E+04	9.43E+03	5.82E+03	2.89E+04	5.49E+04	1.24E+05	2.35E+04	2.71E+03	8.44E+04	1.37E+04	7.10E+04	4.06E+03	6.17E+03	5.13E+03	2.06E+03	8.80E+03	2.68E+05	2.91E+03	2.21E+05	4.20E+04	7.23E+03	4.02E+03	2.31E+03	3.44E+05	1.79E+03	5.08E+02
AcV-521-4	5	9.24E+03	2.18E+03	6.01E+02	5.16E+04	6.96E+04	1.44E+02	7.07E+04	7.64E+04	5.67E+04	5.40E+04	6.16E+05	5.31E+04	2.74E+03	1.10E+05	7.18E+02	1.38E+03	2.75E+05	2.35E+06	1.50E+06	7.59E+02	2.18E+03	3.01E+02	4.59E+04	6.71E+03	3.79E+03	2.13E+04	9.08E+04	2.61E+04	1.97E+02	1.97E+02	7.41E+04	2.29E+04	9.95E+03	2.38E+02	2.38E+02	2.38E+02	1.61E+03	5.02E+02	1.90E+05	5.13E+02	2.31E+05	7.87E+03	8.88E+02	8.88E+02	9.50E+02	6.09E+05	1.43E+02	1.06E+04
AcV-531-4	5	9.71E+03	3.34E+03	6.65E+02	4.30E+04	7.27E+04	1.66E+02	4.20E+04	8.33E+04	2.44E+04	3.61E+04	4.07E+05	4.13E+04	1.14E+02	2.92E+04	4.35E+02	4.35E+02	2.54E+05	2.47E+06	2.09E+06	1.53E+02	1.77E+02	1.77E+02	1.36E+04	8.85E+03	4.46E+02	2.24E+04	6.77E+04	6.81E+03	6.09E+02	6.09E+02	5.76E+04	1.56E+04	1.14E+04	7.64E+02	7.64E+02	7.64E+02	3.82E+02	3.82E+02	2.37E+05	1.68E+03	1.53E+05	4.27E+03	2.57E+02	2.57E+02	1.73E+02	4.37E+05	1.52E+02	4.03E+03
AcV-231-3	5	9.83E+02	8.03E+03	1.41E+03	3.58E+04	3.42E+04	9.68E+03	7.84E+04	1.94E+04	5.63E+04	1.02E+04	4.06E+05	4.47E+04	1.06E+03	2.11E+04	4.09E+02	3.15E+03	1.10E+05	1.53E+06	2.01E+06	4.72E+02	1.23E+04	5.84E+02	2.28E+03	2.51E+03	2.72E+03	3.69E+04	4.47E+04	1.03E+05	4.82E+03	1.71E+02	7.75E+04	1.93E+04	4.60E+04	4.30E+02	4.56E+03	7.40E+03	3.62E+03	4.86E+03	2.01E+05	2.28E+03	1.88E+05	3.97E+04	5.18E+03	1.61E+03	5.90E+01	3.22E+05	5.30E+03	1.23E+03
AcV-211-5	5	6.08E+02	4.08E+03	3.45E+02	7.00E+04	3.34E+04	1.13E+04	4.87E+04	3.82E+04	4.59E+04	1.04E+04	5.12E+05	5.76E+04	2.96E+03	3.45E+04	4.29E+02	2.52E+03	9.03E+04	5.42E+06	2.51E+06	1.07E+02	7.75E+03	5.00E+00	1.06E+04	1.83E+04	2.09E+04	4.00E+04	4.08E+04	9.58E+04	8.08E+03	1.73E+02	8.38E+04	1.60E+04	6.21E+04	4.55E+02	7.21E+03	1.44E+02	1.54E+03	5.24E+03	2.09E+05	4.87E+02	1.94E+05	3.78E+04	2.56E+03	3.00E+00	3.00E+00	4.50E+05	2.36E+02	4.43E+02
AcV-541-4	5	8.35E+03	5.77E+03	5.62E+02	3.44E+04	6.57E+04	4.57E+03	6.04E+04	4.50E+04	3.69E+04	3.00E+04	4.29E+05	3.86E+04	7.31E+02	1.32E+04	1.32E+02	1.32E+02	2.88E+05	2.46E+06	2.16E+06	3.58E+02	3.76E+02	3.76E+02	3.76E+04	7.93E+03	2.62E+03	1.79E+04	6.44E+04	2.11E+04	7.52E+02	7.52E+02	9.09E+04	5.10E+03	1.12E+04	2.27E+02	1.16E+02	1.16E+02	1.37E+02	1.90E+03	1.85E+05	1.47E+03	1.74E+05	5.22E+03	4.94E+02	4.94E+02	4.94E+02	3.36E+05	9.21E+02	8.20E+03
AcV-241-4	5	1.23E+04	2.38E+02	1.59E+03	6.60E+04	3.76E+04	3.27E+03	4.43E+04	4.67E+04	4.14E+04	1.10E+02	4.67E+05	3.04E+04	3.40E+02	2.04E+04	8.18E+02	8.18E+02	7.66E+04	2.27E+06	2.43E+06	8.22E+02	2.33E+03	5.79E+02	4.01E+03	9.78E+02	4.80E+01	4.39E+04	3.70E+04	6.75E+04	1.96E+03	5.07E+03	7.25E+04	2.03E+04	3.35E+04	1.96E+02	1.96E+02	1.51E+03	1.20E+02	1.20E+02	3.59E+05	3.79E+02	1.51E+05	1.51E+04	3.93E+02	3.93E+02	4.89E+03	4.50E+05	2.12E+02	2.57E+03
AcV-331-1	5	8.04E+03	3.96E+03	1.71E+03	6.24E+04	4.52E+04	1.55E+03	5.31E+04	5.21E+04	2.74E+04	8.34E+02	4.44E+05	3.98E+04	1.02E+02	2.59E+04	4.64E+02	1.40E+02	1.03E+05	1.92E+06	2.23E+06	1.24E+02	4.17E+03	4.60E+02	1.52E+03	5.29E+03	3.91E+03	2.84E+04	2.66E+04	7.30E+04	1.28E+03	6.47E+02	1.06E+05	1.16E+04	4.06E+04	1.09E+02	6.98E+03	8.38E+03	1.82E+03	1.60E+02	3.71E+05	3.89E+03	1.98E+05	6.08E+03	1.06E+03	2.68E+03	8.60E+01	3.81E+05	1.65E+02	1.09E+03
AcV-321-5	5	4.14E+03	5.47E+03	9.37E+02	4.85E+04	4.16E+04	1.03E+02	8.01E+04	2.75E+04	3.29E+04	1.64E+04	4.63E+05	3.06E+04	7.56E+02	2.67E+04	6.74E+02	6.74E+02	7.00E+04	1.41E+06	1.87E+06	5.71E+02	3.52E+03	5.78E+02	2.85E+03	1.24E+03	4.59E+02	7.74E+03	5.49E+04	2.81E+04	1.15E+03	4.03E+02	8.71E+04	4.44E+04	8.23E+03	8.00E+02	8.00E+02	8.00E+02	2.05E+03	7.11E+02	3.39E+05	1.17E+03	1.80E+05	3.49E+03	8.16E+02	2.13E+02	2.13E+02	4.63E+05	1.93E+02	1.61E+04
AcV-631-2	5	2.04E+03	3.58E+03	4.06E+03	4.93E+04	3.77E+04	8.47E+03	4.92E+04	3.56E+04	2.87E+04	1.21E+04	4.88E+05	6.22E+04	8.63E+02	2.22E+04	6.89E+02	3.67E+03	1.08E+05	2.06E+06	2.41E+06	6.03E+02	4.77E+03	6.91E+02	1.58E+04	2.94E+03	1.77E+03	2.48E+04	3.90E+04	8.48E+04	1.13E+04	1.09E+02	1.36E+05	1.72E+04	4.44E+04	1.48E+03	1.83E+04	5.11E+03	2.46E+03	3.67E+03	2.72E+05	6.62E+03	2.32E+05	2.80E+04	4.82E+03	4.39E+03	1.29E+02	5.04E+05	1.91E+03	4.44E+02
AcV-341-5	5	8.50E+03	6.10E+02	3.09E+02	5.07E+04	3.53E+04	2.51E+03	3.77E+04	4.88E+04	3.21E+04	1.55E+03	2.82E+05	2.31E+04	3.51E+02	2.46E+04	1.15E+02	1.21E+03	7.01E+04	1.84E+06	1.27E+06	1.02E+02	1.94E+02	1.94E+02	5.78E+03	5.93E+03	4.48E+02	5.85E+03	2.63E+04	4.77E+04	2.95E+02	2.86E+03	9.52E+04	1.60E+04	2.56E+04	2.18E+03	1.45E+03	3.24E+02	6.56E+02	6.56E+02	5.78E+05	1.75E+03	2.66E+05	1.83E+04	2.43E+02	2.43E+02	1.00E+04	2.80E+05	1.04E+02	5.67E+03
AcV-411-2	5	1.67E+02	1.67E+02	1.67E+02	8.54E+04	2.44E+04	3.48E+03	5.36E+04	5.79E+04	5.39E+04	2.59E+04	7.13E+05	3.11E+04	5.79E+03	1.81E+05	1.22E+02	1.22E+02	9.70E+04	2.98E+06	1.21E+06	1.80E+02	5.89E+03	1.34E+02	4.36E+03	3.94E+02	8.42E+02	7.14E+03	4.23E+04	5.50E+04	2.76E+03	7.83E+02	8.75E+04	2.15E+04	2.42E+04	2.76E+02	2.76E+02	2.16E+03	1.83E+02	1.51E+03	4.35E+05	5.18E+03	2.47E+05	2.01E+04	4.66E+02	4.66E+02	4.66E+02	3.02E+05	4.77E+03	2.34E+02
AcV-121-3	5	2.30E+04	4.80E+03	2.20E+02	2.98E+04	3.66E+04	2.36E+03	6.81E+04	4.27E+04	4.53E+04	3.87E+04	3.37E+05	2.63E+04	1.85E+02	1.04E+04	2.95E+02	2.95E+02	1.30E+05	3.08E+06	1.80E+06	5.36E+02	2.45E+02	2.45E+02	2.45E+02	7.94E+02	7.62E+03	3.32E+04	3.98E+04	5.05E+04	4.98E+03	3.58E+02	7.14E+04	9.52E+03	1.74E+04	1.77E+02	4.64E+03	7.34E+02	2.60E+02	2.60E+02	4.71E+05	2.31E+02	2.56E+05	2.54E+04	2.03E+02	2.03E+02	2.03E+02	4.50E+05	7.30E+01	3.09E+03
AcV-351-1	5	2.91E+03	4.97E+03	3.13E+03	7.60E+04	4.53E+04	6.68E+02	5.68E+04	5.04E+04	5.51E+04	1.04E+04	6.24E+05	4.45E+04	3.95E+03	3.57E+04	1.34E+03	1.45E+03	1.13E+05	2.54E+06	3.07E+06	1.61E+02	1.40E+04	6.57E+02	6.37E+03	7.94E+03	6.48E+03	3.73E+04	1.27E+05	6.95E+04	3.21E+03	5.37E+03	1.07E+05	3.18E+04	2.88E+04	1.97E+02	9.70E+03	4.10E+02	2.42E+03	2.92E+02	5.12E+05	6.01E+03	2.68E+05	1.53E+04	8.58E+02	6.59E+02	3.38E+03	5.42E+05	1.95E+02	5.39E+03
AcV-621-3	5	2.95E+03	2.75E+02	2.03E+03	4.72E+04	5.85E+04	4.73E+03	7.63E+04	4.30E+04	4.10E+04	4.09E+04	4.61E+05	3.97E+04	5.21E+03	1.77E+04	7.71E+02	1.27E+02	1.28E+05	2.37E+06	2.56E+06	4.97E+02	7.50E+03	1.41E+02	7.22E+03	2.91E+03	1.61E+02	3.29E+04	4.35E+04	4.50E+04	1.55E+03	4.42E+03	9.42E+04	2.29E+04	2.77E+04	3.00E+01	9.48E+03	7.13E+02	4.80E+02	1.84E+03	2.92E+05	2.07E+03	2.16E+05	1.15E+04	1.67E+02	1.47E+03	6.00E+01	4.94E+05	6.97E+02	7.58E+03
AcV-611-4	5	1.99E+03	1.14E+04	1.13E+03	9.34E+04	1.04E+05	8.78E+03	8.05E+04	4.39E+04	9.47E+04	5.20E+04	5.30E+05	1.01E+05	3.24E+03	4.13E+04	3.42E+02	1.33E+04	2.15E+05	4.29E+06	1.50E+06	7.90E+02	1.01E+04	8.22E+02	2.99E+04	1.73E+04	2.24E+04	2.34E+04	1.11E+05	7.38E+04	1.20E+04	3.90E+01	9.95E+04	1.81E+04	5.45E+04	2.20E+03	1.60E+02	2.02E+03	3.06E+03	3.41E+03	1.51E+05	3.10E+03	4.39E+05	2.49E+04	5.40E+03	1.92E+03	9.13E+02	5.06E+05	1.06E+03	2.68E+03
AcV-511-4	5	1.79E+03	8.11E+02	2.67E+02	5.19E+04	7.16E+04	1.48E+02	4.93E+04	8.58E+04	3.05E+04	1.96E+04	4.50E+05	4.56E+04	1.02E+02	2.54E+04	3.80E+02	3.80E+02	2.36E+05	2.26E+06	2.22E+06	1.12E+02	8.29E+02	8.29E+02	5.85E+03	4.86E+03	2.68E+02	3.00E+04	6.62E+04	1.80E+04	2.16E+02	6.53E+03	6.02E+04	2.38E+04	5.75E+03	7.65E+02	7.65E+02	1.20E+03	2.54E+02	2.54E+02	2.56E+05	1.07E+04	1.64E+05	1.41E+02	1.41E+02	1.41E+02	1.41E+02	4.97E+05	1.87E+02	6.48E+03
AcV-141-4	5	8.65E+02	5.66E+03	4.61E+02	4.67E+04	3.66E+04	1.85E+03	3.14E+04	2.51E+04	4.08E+04	5.15E+03	4.90E+05	2.45E+04	1.92E+02	5.60E+04	1.91E+03	2.80E+02	1.20E+05	2.38E+06	2.51E+06	8.67E+02	4.30E+01	4.30E+01	4.64E+03	2.08E+03	5.31E+03	2.35E+04	3.60E+04	5.12E+04	1.42E+02	3.88E+03	5.70E+04	2.08E+04	2.83E+04	2.02E+02	2.02E+02	2.02E+02	9.00E+02	9.00E+02	1.82E+05	4.28E+03	1.56E+05	1.53E+04	5.56E+02	3.61E+03	4.36E+02	4.67E+05	1.31E+02	3.76E+02
AcV-251-5	5	1.62E+03	6.24E+03	1.70E+03	5.37E+04	4.82E+04	3.85E+04	5.47E+04	3.59E+04	1.06E+05	1.81E+04	5.09E+05	8.00E+04	6.26E+03	6.04E+04	4.70E+01	2.41E+03	1.42E+05	3.11E+06	6.96E+05	3.10E+01	1.09E+04	2.10E+02	2.09E+04	1.23E+04	1.45E+04	6.97E+03	2.48E+04	2.72E+05	4.84E+04	4.35E+02	1.11E+05	1.50E+04	1.64E+05	3.57E+03	2.14E+03	6.52E+03	1.21E+04	1.70E+04	1.17E+05	1.73E+03	4.55E+05	1.02E+05	1.46E+03	3.14E+03	1.38E+03	4.17E+05	1.55E+04	3.90E+03
AcV-421-1	5	5.80E+02	1.52E+03	1.38E+02	7.13E+04	4.63E+04	3.80E+03	3.75E+04	5.54E+04	3.31E+04	1.03E+04	5.60E+05	2.96E+04	1.97E+03	1.87E+04	2.16E+02	8.05E+02	1.29E+05	2.35E+06	2.42E+06	7.59E+02	2.37E+03	3.11E+02	3.60E+03	4.08E+03	7.70E+02	2.71E+04	5.59E+04	6.98E+04	6.63E+03	1.04E+02	1.30E+05	1.87E+04	2.32E+04	1.51E+02	5.56E+03	1.81E+02	1.97E+02	1.97E+02	6.11E+05	2.05E+03	2.78E+05	1.55E+04	6.90E+02	2.88E+03	1.43E+04	5.33E+05	3.41E+03	1.08E+04
AcV-451-4	5	1.62E+02	4.22E+03	5.80E+02	5.93E+04	6.86E+04	3.18E+03	7.17E+04	3.30E+04	2.51E+04	1.13E+04	5.31E+05	4.79E+04	1.18E+04	1.70E+04	3.78E+02	2.82E+03	1.02E+05	1.94E+06	2.69E+06	5.76E+02	1.42E+04	2.43E+02	7.02E+03	3.98E+03	4.03E+03	5.17E+04	5.37E+04	5.09E+04	4.41E+03	3.47E+03	9.41E+04	5.73E+04	2.55E+04	4.08E+02	7.26E+03	6.08E+02	1.31E+03	2.06E+02	5.04E+05	3.94E+03	3.04E+05	1.68E+04	1.80E+03	5.76E+02	1.14E+02	7.88E+05	1.72E+03	3.23E+02
AcV-441-2	5	9.55E+03	5.88E+02	5.39E+02	4.49E+04	7.04E+04	1.24E+02	4.41E+04	2.37E+04	2.22E+04	1.81E+04	4.01E+05	3.86E+04	1.17E+02	2.68E+04	1.70E+02	4.27E+02	1.15E+05	1.83E+06	1.93E+06	1.64E+02	2.06E+03	4.07E+02	3.74E+03	1.03E+02	5.62E+03	1.25E+04	4.45E+04	4.57E+04	5.42E+03	2.55E+02	7.12E+04	2.10E+04	2.59E+04	3.60E+02	4.77E+03	1.23E+02	2.31E+02	2.61E+03	3.71E+05	5.42E+03	1.94E+05	1.56E+04	3.25E+03	2.33E+02	2.33E+02	5.35E+05	5.59E+02	1.43E+03
AcV-431-3	5	6.61E+02	4.50E+01	4.50E+01	6.55E+04	5.18E+04	6.10E+02	7.23E+04	5.69E+04	5.36E+04	3.53E+04	5.32E+05	4.34E+04	5.47E+03	3.89E+04	7.40E+02	4.53E+03	9.78E+04	2.32E+06	2.39E+06	4.91E+02	5.29E+03	4.01E+02	7.20E+03	7.87E+02	1.46E+04	3.61E+04	5.77E+04	7.22E+04	1.79E+02	2.39E+03	1.16E+05	3.54E+04	2.40E+04	1.00E+02	4.73E+03	1.85E+02	1.97E+02	1.97E+02	4.61E+05	7.70E+02	3.04E+05	3.50E+04	1.00E+03	7.11E+03	5.21E+02	5.80E+05	2.50E+02	2.28E+03
AcV-221-5	5	2.11E+03	1.07E+02	1.98E+03	5.93E+04	5.66E+04	5.18E+03	6.44E+04	4.23E+04	2.50E+04	9.45E+03	6.33E+05	4.17E+04	3.02E+03	4.56E+04	6.00E+02	6.00E+02	8.19E+04	1.57E+06	3.33E+06	1.36E+02	3.81E+03	3.80E+02	3.80E+02	3.80E+02	4.73E+03	5.94E+04	2.45E+04	8.46E+04	1.61E+04	2.35E+02	8.62E+04	7.03E+03	4.33E+04	2.11E+03	7.60E+03	1.00E+03	2.34E+03	6.97E+03	3.04E+05	4.58E+03	1.89E+05	2.36E+04	1.69E+03	2.25E+03	3.75E+02	4.92E+05	4.79E+03	6.53E+03
AcV-151-4	5	1.45E+02	4.50E+03	1.29E+03	6.79E+04	4.00E+04	1.22E+04	7.15E+04	3.64E+04	4.04E+04	7.86E+03	5.95E+05	3.89E+04	9.82E+02	3.52E+04	1.44E+03	1.04E+04	1.38E+05	1.59E+06	3.22E+06	3.51E+02	8.90E+03	7.74E+02	7.00E+03	2.10E+01	4.22E+03	5.76E+04	5.36E+04	1.74E+05	1.17E+04	1.74E+02	1.30E+05	1.49E+04	7.63E+04	8.58E+02	1.82E+04	6.50E+03	6.83E+03	4.34E+03	2.64E+05	2.87E+03	2.43E+05	5.54E+04	8.76E+03	4.37E+03	3.03E+03	5.88E+05	5.15E+02	3.85E+03
AcV-111-3	5	4.69E+03	7.72E+03	4.30E+01	6.03E+04	4.78E+04	1.80E+04	1.02E+05	5.63E+04	4.57E+04	1.65E+04	2.33E+05	4.76E+04	9.00E+00	3.59E+03	1.61E+02	4.19E+03	7.55E+04	1.53E+06	1.03E+06	3.07E+02	1.56E+04	1.66E+02	1.54E+04	1.19E+02	5.20E+03	4.74E+03	2.16E+04	2.66E+05	2.05E+04	7.00E+03	8.84E+04	1.15E+04	1.10E+05	3.87E+03	8.49E+02	4.40E+03	7.00E+03	1.28E+04	2.95E+05	5.46E+03	2.41E+05	8.36E+04	3.89E+03	2.65E+03	1.22E+03	2.85E+05	2.90E+03	7.05E+03
AcV-311-1	5	2.90E+03	2.96E+03	1.87E+02	8.68E+04	5.80E+04	1.81E+02	9.07E+04	4.46E+04	5.05E+04	5.48E+03	3.28E+05	3.33E+04	2.20E+02	1.84E+04	7.78E+02	4.55E+03	1.00E+05	1.84E+06	1.92E+06	2.84E+02	1.30E+04	8.02E+02	7.45E+03	5.83E+03	6.27E+02	6.39E+03	6.06E+04	7.67E+04	2.37E+02	2.77E+02	1.09E+05	3.95E+04	3.34E+04	1.20E+02	5.19E+03	1.92E+02	4.17E+03	1.17E+02	5.35E+05	4.83E+03	3.17E+05	1.49E+04	6.25E+03	6.87E+03	4.35E+03	4.99E+05	3.96E+02	9.95E+02
[truncated: 5,000 more columns]
